# Supplementary material for: In-Silico Conceptualisation of Continuous Millifluidic Separators for Magnetic Nanoparticles
Source: MDPI journal article supplement (doi:10.3390/ma14216635), 2021-11-04
Supplement: s1 [file s1]

# In-silico Conceptualisation of Continuous Millifluidic Separators for Magnetic Nanoparticles

Yanzhe Wen <sup>1</sup>, Dai Jiang <sup>2</sup>, Asterios Gavriilidis <sup>1\*</sup> and Maximilian O. Besenhard <sup>1,3\*</sup>

<sup>1.</sup> Department of Chemical Engineering, University College London, Torrington Place, London, WC1E 7JE, UK

<sup>2.</sup> Department of Electronic and Electrical Engineering, University College London, Torrington Place, London, WC1E 7JE, UK

<sup>3.</sup> School of Chemical and Process Engineering, University of Leeds, Leeds, LS2 9JT, UK

\* Correspondence: a.gavriilidis@ucl.ac.uk and m.besenhard@ucl.ac.uk;

## Supplementary Information

### Table of Content

|                                                                      |    |
|----------------------------------------------------------------------|----|
| S1. Time Discretisation .....                                        | 2  |
| S2. Particle Trajectories.....                                       | 2  |
| S3. Potential to Retain Particles via Multiple Separation Steps..... | 3  |
| S4. Initial Screening Optimisation Study 250 nm IONPs .....          | 4  |
| S5. Initial Screening Optimisation Study 500 nm IONPs .....          | 26 |

## S1. Time Discretisation

In order to determine the best compromise between accuracy and computational effort three different time steps, i.e.,  $\Delta t = 0.1$  s,  $\Delta t = 0.01$  s, and  $\Delta t = 0.001$  s, were used for otherwise identical simulations conditions. There was no considerable difference in the separator efficiency for all separation conditions simulated using different time steps (see Error! Reference source not found.). Therefore,  $\Delta t = 0.01$  s was considered as sufficiently small and used for all simulations.

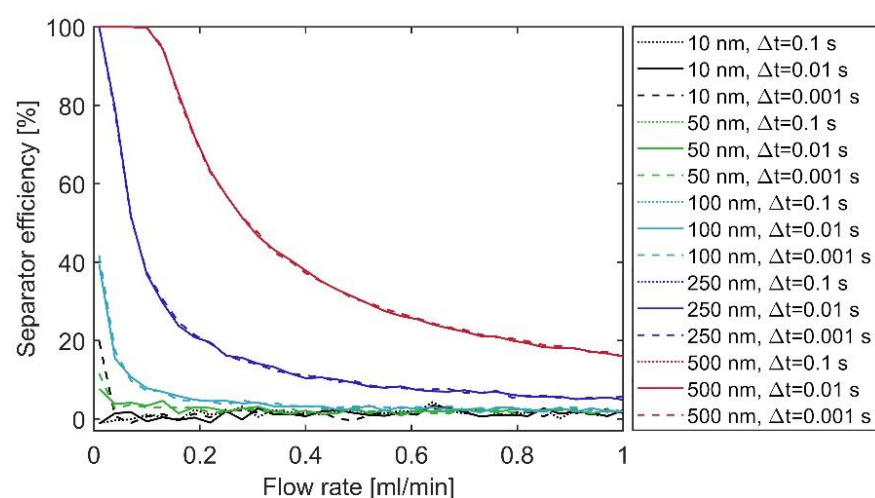

**Figure S1.** Reproduction of results shown in Figure 4b using different time steps ( $\Delta t = 0.1$  s,  $0.01$  s, and  $0.001$  s)

## S2. Particle Trajectories

Particle trajectories (20 out of 10,000 trajectories calculated) for additional separation conditions presented in Figure 4a are shown in Error! Reference source not found..

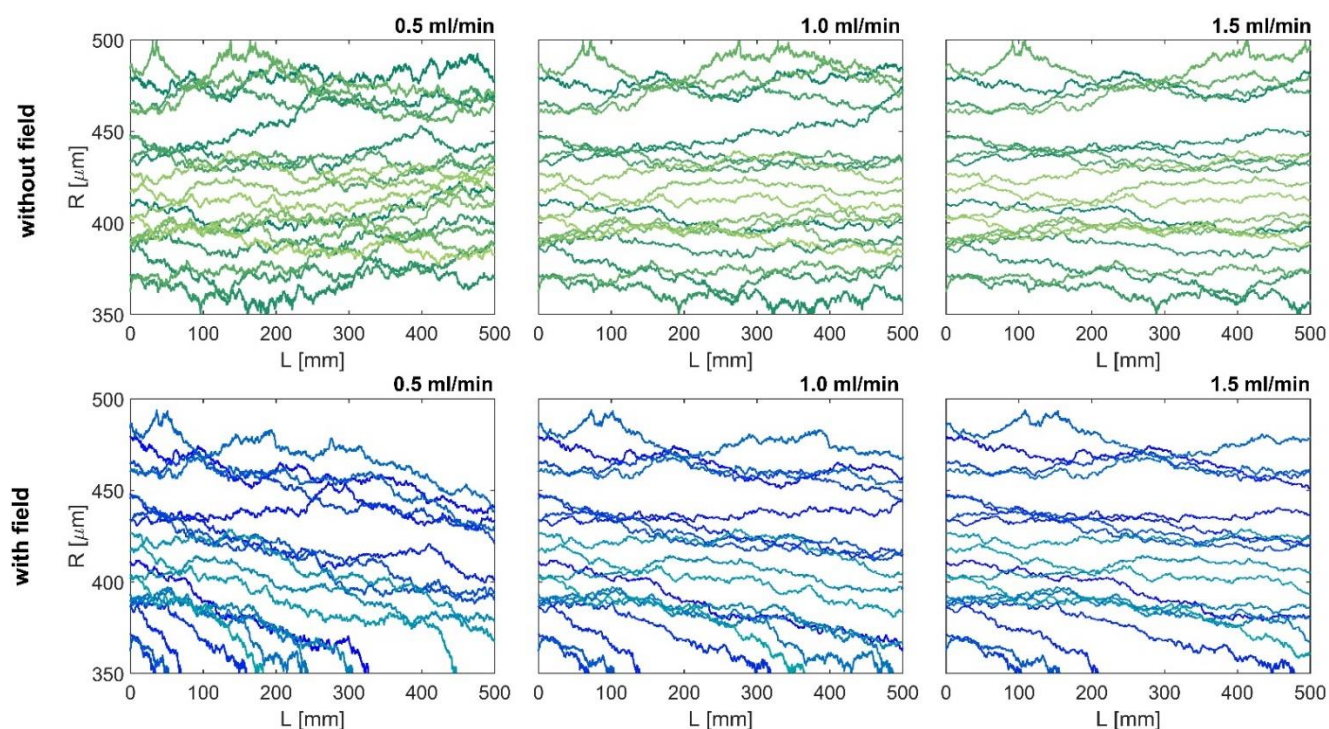

**Figure S2.** 20 particle trajectories of 250 nm IONPs in the magnetic separator ( $r_{tube} = 500$   $\mu\text{m}$ , and  $r_{wire}/r_{tube} = 0.7$ ) operated without and with magnetic at a flowrate of 0.5 ml/min (identical to Figure 4a), 1.0 ml/min, and 1.5 ml/min.

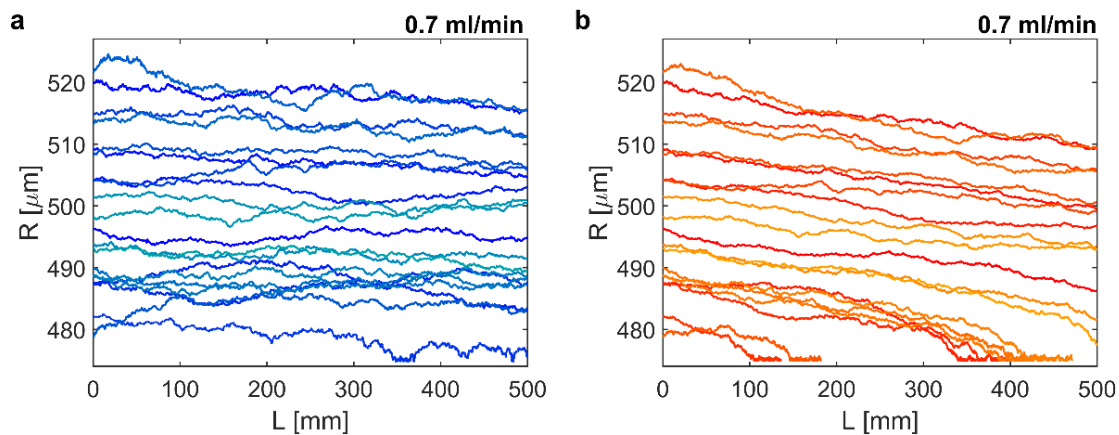

**Figure S3.** 20 particle trajectories (out of 10,000) for the optimum separation condition considering the temperature constraint ( $\Delta T < 10\text{ }^{\circ}\text{C}$ ) for (a) 250 nm MNPs yielding 13% separator efficiency at 0.7 ml/min ( $r_{tube} = 527\text{ }\mu\text{m}$ ,  $r_{wire} = 474\text{ }\mu\text{m}$ ,  $r_{wire}/r_{tube} = 0.9$ ), and (b) 500 nm MNPs yielding 44% separator efficiency at 0.7 ml/min ( $r_{tube} = 527\text{ }\mu\text{m}$ ,  $r_{wire} = 474\text{ }\mu\text{m}$ ,  $r_{wire}/r_{tube} = 0.9$ ).

### S3. Potential to Retain Particles via Multiple Separation Steps

The potential to retain particles was discussed in terms of the probability for particles to touch the wire in a single separation step, i.e., the percentage of MNPs that touched the wire surface when the solution passed through the separator ( $q_{retain}$ ). The article reports these percentages for the optimum separation conditions for 250 and 500 nm particles, as well as the best separation conditions considering the temperature constraint for 250 and 500 nm particles.

When multiple separators are used in series, more particles can be retained. The concentration of MNPs left in solution ( $MNP_N$ ) after each separation step ( $N$ ) is given by

$$MNP_N = MNP_{N-1} \cdot (1 - q_{retain}/100) \quad (\text{S1})$$

It should be highlighted that eq. S1 assumes that the MNPs solution is homogenised before each separation step, i.e.,  $q_{retain}$  is the same for each separation step as the MNPs have the same radially dependent initialisation likelihood as when entering the previous separator. This reflects the experimental constraints, since the MNP solutions would be mixed when transferred between separators. Although the structure of eq. S1 is similar to the exponential decay law (see eq. S2), the discrete nature of  $N$  requires the use of eq. S1.

$$MNP_N = MNP_{N=0} \cdot \exp(-q_{retain} \cdot N/100) \quad (\text{S2})$$

The drop of non retained MNPs with the increase in separation steps is shown in **Error! Reference source not found.** for the four cases reported in the main article, i.e., 250 nm MNPs for optimum conditions ( $q_{retain} = 51.57\%$ ), 500 nm MNPs for optimum conditions ( $q_{retain} = 47.34\%$ ), 250 nm MNPs for conditions considering the temperature constraint ( $q_{retain} = 7.56\%$ ) and 500 nm MNPs for conditions considering the temperature constraint ( $q_{retain} = 25.46\%$ ).

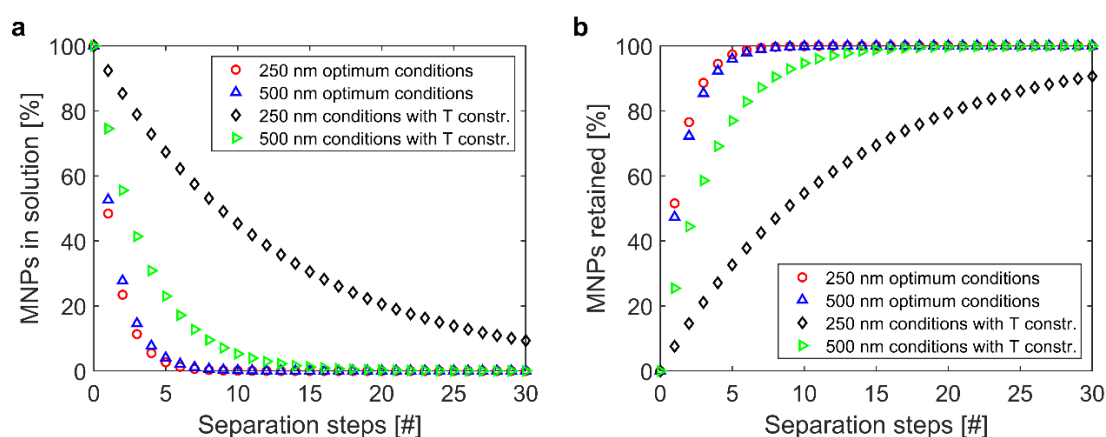

**Figure S4.** Relative concentration of MNPs in (a) solution and (b) retained ( $=100 - \text{MNPs in solution}$ ), after multiple separation steps calculated via eq. S1 using the percentages of particles that touched the wire in a single separation step for the four cases discussed in the article; 250 nm MNPs for optimum conditions ( $q_{\text{retain}} = 51.57\%$ ), 500 nm MNPs for optimum conditions ( $q_{\text{retain}} = 47.34\%$ ), 250 nm MNPs for conditions considering the temperature constraint ( $q_{\text{retain}} = 7.56\%$ ), 500 nm MNPs for conditions considering the temperature constraint ( $q_{\text{retain}} = 25.46\%$ ).

#### S4. Initial Screening Optimisation Study for 250 nm IONPs

The results of the initial optimisation design space screening for 250 nm IONPs computing 1,000 particle trajectories are shown in **Table S1**.

**Table S1.** Capture and separator efficiency for the 900 simulations (10 tubing radii, 9 wire-to-tube radius ratios, and 10 flowrates between 0.01 ml/min and 1.00 ml/min) performed for the initial screening of the design space optimisation.

|    | Flowrate | Tubing radius     | Wire-to-tubing rad. | Capture Efficiency | Separator Efficiency |
|----|----------|-------------------|---------------------|--------------------|----------------------|
|    | [ml/min] | [ $\mu\text{m}$ ] | [-]                 | [%]                | [%]                  |
| 1  | 0.01     | 300               | 0.1                 | 57.7               | 1.65                 |
| 2  | 0.01     | 300               | 0.2                 | 60.8               | 12.92                |
| 3  | 0.01     | 300               | 0.3                 | 59                 | 11.35                |
| 4  | 0.01     | 300               | 0.4                 | 63.6               | 22.78                |
| 5  | 0.01     | 300               | 0.5                 | 69.4               | 36.03                |
| 6  | 0.01     | 300               | 0.6                 | 77.1               | 52.69                |
| 7  | 0.01     | 300               | 0.7                 | 84.7               | 68.70                |
| 8  | 0.01     | 300               | 0.8                 | 97.9               | 95.74                |
| 9  | 0.01     | 300               | 0.9                 | 96.9               | 93.76                |
| 10 | 0.01     | 328.40            | 0.1                 | 59.3               | 5.37                 |
| 11 | 0.01     | 328.40            | 0.2                 | 57.7               | 6.03                 |
| 12 | 0.01     | 328.40            | 0.3                 | 60.9               | 15.46                |
| 13 | 0.01     | 328.40            | 0.4                 | 63.4               | 22.36                |
| 14 | 0.01     | 328.40            | 0.5                 | 71.9               | 41.26                |
| 15 | 0.01     | 328.40            | 0.6                 | 79.1               | 56.82                |
| 16 | 0.01     | 328.40            | 0.7                 | 94.1               | 87.93                |
| 17 | 0.01     | 328.40            | 0.8                 | 99.5               | 98.99                |
| 18 | 0.01     | 328.40            | 0.9                 | 98.6               | 97.18                |
| 19 | 0.01     | 356.79            | 0.1                 | 58.8               | 4.21                 |
| 20 | 0.01     | 356.79            | 0.2                 | 57                 | 4.47                 |
| 21 | 0.01     | 356.79            | 0.3                 | 60.3               | 14.16                |
| 22 | 0.01     | 356.79            | 0.4                 | 66.3               | 28.51                |
| 23 | 0.01     | 356.79            | 0.5                 | 73.1               | 43.76                |
| 24 | 0.01     | 356.79            | 0.6                 | 86                 | 71.08                |
| 25 | 0.01     | 356.79            | 0.7                 | 99.2               | 98.36                |
| 26 | 0.01     | 356.79            | 0.8                 | 99.7               | 99.39                |
| 27 | 0.01     | 356.79            | 0.9                 | 99.5               | 98.99                |

|    |      |        |     |      |        |
|----|------|--------|-----|------|--------|
| 28 | 0.01 | 385.19 | 0.1 | 59.6 | 6.07   |
| 29 | 0.01 | 385.19 | 0.2 | 60.9 | 13.14  |
| 30 | 0.01 | 385.19 | 0.3 | 61.7 | 17.19  |
| 31 | 0.01 | 385.19 | 0.4 | 69.7 | 35.72  |
| 32 | 0.01 | 385.19 | 0.5 | 74.5 | 46.69  |
| 33 | 0.01 | 385.19 | 0.6 | 93   | 85.54  |
| 34 | 0.01 | 385.19 | 0.7 | 99.6 | 99.18  |
| 35 | 0.01 | 385.19 | 0.8 | 100  | 100.00 |
| 36 | 0.01 | 385.19 | 0.9 | 99.9 | 99.80  |
| 37 | 0.01 | 413.58 | 0.1 | 57.9 | 2.12   |
| 38 | 0.01 | 413.58 | 0.2 | 59.6 | 10.25  |
| 39 | 0.01 | 413.58 | 0.3 | 64.1 | 22.38  |
| 40 | 0.01 | 413.58 | 0.4 | 69.8 | 35.94  |
| 41 | 0.01 | 413.58 | 0.5 | 76   | 49.83  |
| 42 | 0.01 | 413.58 | 0.6 | 96.7 | 93.18  |
| 43 | 0.01 | 413.58 | 0.7 | 100  | 100.00 |
| 44 | 0.01 | 413.58 | 0.8 | 100  | 100.00 |
| 45 | 0.01 | 413.58 | 0.9 | 100  | 100.00 |
| 46 | 0.01 | 441.98 | 0.1 | 58.1 | 2.58   |
| 47 | 0.01 | 441.98 | 0.2 | 58.9 | 8.70   |
| 48 | 0.01 | 441.98 | 0.3 | 61.5 | 16.76  |
| 49 | 0.01 | 441.98 | 0.4 | 70.7 | 37.84  |
| 50 | 0.01 | 441.98 | 0.5 | 83   | 64.46  |
| 51 | 0.01 | 441.98 | 0.6 | 98.3 | 96.49  |
| 52 | 0.01 | 441.98 | 0.7 | 100  | 100.00 |
| 53 | 0.01 | 441.98 | 0.8 | 100  | 100.00 |
| 54 | 0.01 | 441.98 | 0.9 | 100  | 100.00 |
| 55 | 0.01 | 470.37 | 0.1 | 59.1 | 4.91   |
| 56 | 0.01 | 470.37 | 0.2 | 58.8 | 8.47   |
| 57 | 0.01 | 470.37 | 0.3 | 63.8 | 21.73  |
| 58 | 0.01 | 470.37 | 0.4 | 69.6 | 35.51  |
| 59 | 0.01 | 470.37 | 0.5 | 89.1 | 77.21  |
| 60 | 0.01 | 470.37 | 0.6 | 99   | 97.93  |
| 61 | 0.01 | 470.37 | 0.7 | 99.9 | 99.80  |
| 62 | 0.01 | 470.37 | 0.8 | 100  | 100.00 |
| 63 | 0.01 | 470.37 | 0.9 | 100  | 100.00 |
| 64 | 0.01 | 498.77 | 0.1 | 58   | 2.35   |
| 65 | 0.01 | 498.77 | 0.2 | 60.7 | 12.69  |
| 66 | 0.01 | 498.77 | 0.3 | 63.4 | 20.86  |
| 67 | 0.01 | 498.77 | 0.4 | 68.9 | 34.03  |
| 68 | 0.01 | 498.77 | 0.5 | 93.9 | 87.25  |
| 69 | 0.01 | 498.77 | 0.6 | 99.8 | 99.59  |
| 70 | 0.01 | 498.77 | 0.7 | 100  | 100.00 |
| 71 | 0.01 | 498.77 | 0.8 | 100  | 100.00 |
| 72 | 0.01 | 498.77 | 0.9 | 100  | 100.00 |
| 73 | 0.01 | 527.16 | 0.1 | 58.9 | 4.44   |
| 74 | 0.01 | 527.16 | 0.2 | 58.2 | 7.14   |
| 75 | 0.01 | 527.16 | 0.3 | 62.4 | 18.70  |
| 76 | 0.01 | 527.16 | 0.4 | 72   | 40.60  |
| 77 | 0.01 | 527.16 | 0.5 | 94.9 | 89.34  |
| 78 | 0.01 | 527.16 | 0.6 | 99.7 | 99.38  |
| 79 | 0.01 | 527.16 | 0.7 | 100  | 100.00 |
| 80 | 0.01 | 527.16 | 0.8 | 100  | 100.00 |
| 81 | 0.01 | 527.16 | 0.9 | 100  | 100.00 |

|     |      |        |     |      |        |
|-----|------|--------|-----|------|--------|
| 82  | 0.01 | 555.56 | 0.1 | 59   | 4.68   |
| 83  | 0.01 | 555.56 | 0.2 | 59.4 | 9.81   |
| 84  | 0.01 | 555.56 | 0.3 | 63.6 | 21.30  |
| 85  | 0.01 | 555.56 | 0.4 | 75.9 | 48.88  |
| 86  | 0.01 | 555.56 | 0.5 | 96.9 | 93.52  |
| 87  | 0.01 | 555.56 | 0.6 | 100  | 100.00 |
| 88  | 0.01 | 555.56 | 0.7 | 100  | 100.00 |
| 89  | 0.01 | 555.56 | 0.8 | 100  | 100.00 |
| 90  | 0.01 | 555.56 | 0.9 | 100  | 100.00 |
| 91  | 0.12 | 300    | 0.1 | 57.4 | 0.96   |
| 92  | 0.12 | 300    | 0.2 | 56.2 | 2.70   |
| 93  | 0.12 | 300    | 0.3 | 55.2 | 3.13   |
| 94  | 0.12 | 300    | 0.4 | 53.3 | 0.93   |
| 95  | 0.12 | 300    | 0.5 | 52.6 | 0.91   |
| 96  | 0.12 | 300    | 0.6 | 55.8 | 8.69   |
| 97  | 0.12 | 300    | 0.7 | 54.5 | 6.93   |
| 98  | 0.12 | 300    | 0.8 | 59.4 | 17.65  |
| 99  | 0.12 | 300    | 0.9 | 61.2 | 21.89  |
| 100 | 0.12 | 328.40 | 0.1 | 57.7 | 1.65   |
| 101 | 0.12 | 328.40 | 0.2 | 56.2 | 2.70   |
| 102 | 0.12 | 328.40 | 0.3 | 54.8 | 2.27   |
| 103 | 0.12 | 328.40 | 0.4 | 54.9 | 4.33   |
| 104 | 0.12 | 328.40 | 0.5 | 53.5 | 2.79   |
| 105 | 0.12 | 328.40 | 0.6 | 54.1 | 5.17   |
| 106 | 0.12 | 328.40 | 0.7 | 57.4 | 12.86  |
| 107 | 0.12 | 328.40 | 0.8 | 61.7 | 22.32  |
| 108 | 0.12 | 328.40 | 0.9 | 63.3 | 26.11  |
| 109 | 0.12 | 356.79 | 0.1 | 58.7 | 3.98   |
| 110 | 0.12 | 356.79 | 0.2 | 56.4 | 3.14   |
| 111 | 0.12 | 356.79 | 0.3 | 55.8 | 4.43   |
| 112 | 0.12 | 356.79 | 0.4 | 55.4 | 5.39   |
| 113 | 0.12 | 356.79 | 0.5 | 54.6 | 5.09   |
| 114 | 0.12 | 356.79 | 0.6 | 54.8 | 6.62   |
| 115 | 0.12 | 356.79 | 0.7 | 60.5 | 19.20  |
| 116 | 0.12 | 356.79 | 0.8 | 62.4 | 23.74  |
| 117 | 0.12 | 356.79 | 0.9 | 67.3 | 34.17  |
| 118 | 0.12 | 385.19 | 0.1 | 58.1 | 2.58   |
| 119 | 0.12 | 385.19 | 0.2 | 56   | 2.25   |
| 120 | 0.12 | 385.19 | 0.3 | 54.2 | 0.97   |
| 121 | 0.12 | 385.19 | 0.4 | 54.8 | 4.11   |
| 122 | 0.12 | 385.19 | 0.5 | 54.6 | 5.09   |
| 123 | 0.12 | 385.19 | 0.6 | 57.3 | 11.78  |
| 124 | 0.12 | 385.19 | 0.7 | 60.7 | 19.61  |
| 125 | 0.12 | 385.19 | 0.8 | 64   | 26.98  |
| 126 | 0.12 | 385.19 | 0.9 | 69.2 | 37.99  |
| 127 | 0.12 | 413.58 | 0.1 | 57.8 | 1.89   |
| 128 | 0.12 | 413.58 | 0.2 | 56.4 | 3.14   |
| 129 | 0.12 | 413.58 | 0.3 | 55.3 | 3.35   |
| 130 | 0.12 | 413.58 | 0.4 | 55.3 | 5.18   |
| 131 | 0.12 | 413.58 | 0.5 | 55.1 | 6.14   |
| 132 | 0.12 | 413.58 | 0.6 | 60.1 | 17.57  |
| 133 | 0.12 | 413.58 | 0.7 | 63   | 24.31  |
| 134 | 0.12 | 413.58 | 0.8 | 67.2 | 33.47  |
| 135 | 0.12 | 413.58 | 0.9 | 74   | 47.66  |

|     |      |        |     |      |       |
|-----|------|--------|-----|------|-------|
| 136 | 0.12 | 441.98 | 0.1 | 57.2 | 0.49  |
| 137 | 0.12 | 441.98 | 0.2 | 55.8 | 1.81  |
| 138 | 0.12 | 441.98 | 0.3 | 54.1 | 0.75  |
| 139 | 0.12 | 441.98 | 0.4 | 54.8 | 4.11  |
| 140 | 0.12 | 441.98 | 0.5 | 56.3 | 8.64  |
| 141 | 0.12 | 441.98 | 0.6 | 59.9 | 17.16 |
| 142 | 0.12 | 441.98 | 0.7 | 62.3 | 22.88 |
| 143 | 0.12 | 441.98 | 0.8 | 68.6 | 36.31 |
| 144 | 0.12 | 441.98 | 0.9 | 76.2 | 52.08 |
| 145 | 0.12 | 470.37 | 0.1 | 58.2 | 2.82  |
| 146 | 0.12 | 470.37 | 0.2 | 56.6 | 3.59  |
| 147 | 0.12 | 470.37 | 0.3 | 55.4 | 3.57  |
| 148 | 0.12 | 470.37 | 0.4 | 55   | 4.54  |
| 149 | 0.12 | 470.37 | 0.5 | 57.7 | 11.57 |
| 150 | 0.12 | 470.37 | 0.6 | 62.7 | 22.94 |
| 151 | 0.12 | 470.37 | 0.7 | 65   | 28.40 |
| 152 | 0.12 | 470.37 | 0.8 | 70.4 | 39.96 |
| 153 | 0.12 | 470.37 | 0.9 | 76.3 | 52.29 |
| 154 | 0.12 | 498.77 | 0.1 | 57.8 | 1.89  |
| 155 | 0.12 | 498.77 | 0.2 | 56.5 | 3.36  |
| 156 | 0.12 | 498.77 | 0.3 | 55.1 | 2.92  |
| 157 | 0.12 | 498.77 | 0.4 | 55.4 | 5.39  |
| 158 | 0.12 | 498.77 | 0.5 | 57.4 | 10.94 |
| 159 | 0.12 | 498.77 | 0.6 | 62.2 | 21.91 |
| 160 | 0.12 | 498.77 | 0.7 | 66.4 | 31.27 |
| 161 | 0.12 | 498.77 | 0.8 | 74.8 | 48.89 |
| 162 | 0.12 | 498.77 | 0.9 | 79.8 | 59.33 |
| 163 | 0.12 | 527.16 | 0.1 | 58.7 | 3.98  |
| 164 | 0.12 | 527.16 | 0.2 | 56.6 | 3.59  |
| 165 | 0.12 | 527.16 | 0.3 | 55.3 | 3.35  |
| 166 | 0.12 | 527.16 | 0.4 | 56.1 | 6.87  |
| 167 | 0.12 | 527.16 | 0.5 | 58.3 | 12.82 |
| 168 | 0.12 | 527.16 | 0.6 | 61.9 | 21.29 |
| 169 | 0.12 | 527.16 | 0.7 | 69.4 | 37.40 |
| 170 | 0.12 | 527.16 | 0.8 | 74.2 | 47.67 |
| 171 | 0.12 | 527.16 | 0.9 | 81   | 61.75 |
| 172 | 0.12 | 555.56 | 0.1 | 57.9 | 2.12  |
| 173 | 0.12 | 555.56 | 0.2 | 56   | 2.25  |
| 174 | 0.12 | 555.56 | 0.3 | 56.3 | 5.51  |
| 175 | 0.12 | 555.56 | 0.4 | 56.4 | 7.51  |
| 176 | 0.12 | 555.56 | 0.5 | 59   | 14.29 |
| 177 | 0.12 | 555.56 | 0.6 | 63.6 | 24.80 |
| 178 | 0.12 | 555.56 | 0.7 | 71.5 | 41.70 |
| 179 | 0.12 | 555.56 | 0.8 | 76.9 | 53.15 |
| 180 | 0.12 | 555.56 | 0.9 | 81.8 | 63.36 |
| 181 | 0.23 | 300    | 0.1 | 57.2 | 0.49  |
| 182 | 0.23 | 300    | 0.2 | 55   | 0.03  |
| 183 | 0.23 | 300    | 0.3 | 54.4 | 1.40  |
| 184 | 0.23 | 300    | 0.4 | 53.9 | 2.21  |
| 185 | 0.23 | 300    | 0.5 | 53.5 | 2.79  |
| 186 | 0.23 | 300    | 0.6 | 53.3 | 3.52  |
| 187 | 0.23 | 300    | 0.7 | 52.9 | 3.65  |
| 188 | 0.23 | 300    | 0.8 | 56.1 | 10.96 |
| 189 | 0.23 | 300    | 0.9 | 57   | 13.43 |

|     |      |        |     |      |       |
|-----|------|--------|-----|------|-------|
| 190 | 0.23 | 328.40 | 0.1 | 57.5 | 1.19  |
| 191 | 0.23 | 328.40 | 0.2 | 55.1 | 0.25  |
| 192 | 0.23 | 328.40 | 0.3 | 54   | 0.54  |
| 193 | 0.23 | 328.40 | 0.4 | 53.8 | 1.99  |
| 194 | 0.23 | 328.40 | 0.5 | 53.9 | 3.63  |
| 195 | 0.23 | 328.40 | 0.6 | 54.6 | 6.21  |
| 196 | 0.23 | 328.40 | 0.7 | 55   | 7.95  |
| 197 | 0.23 | 328.40 | 0.8 | 57.2 | 13.19 |
| 198 | 0.23 | 328.40 | 0.9 | 58.5 | 16.45 |
| 199 | 0.23 | 356.79 | 0.1 | 57.4 | 0.96  |
| 200 | 0.23 | 356.79 | 0.2 | 56.1 | 2.48  |
| 201 | 0.23 | 356.79 | 0.3 | 55.1 | 2.92  |
| 202 | 0.23 | 356.79 | 0.4 | 54.5 | 3.48  |
| 203 | 0.23 | 356.79 | 0.5 | 53.8 | 3.42  |
| 204 | 0.23 | 356.79 | 0.6 | 55.1 | 7.24  |
| 205 | 0.23 | 356.79 | 0.7 | 56.1 | 10.20 |
| 206 | 0.23 | 356.79 | 0.8 | 58.5 | 15.83 |
| 207 | 0.23 | 356.79 | 0.9 | 59.9 | 19.27 |
| 208 | 0.23 | 385.19 | 0.1 | 58.4 | 3.28  |
| 209 | 0.23 | 385.19 | 0.2 | 56   | 2.25  |
| 210 | 0.23 | 385.19 | 0.3 | 54.1 | 0.75  |
| 211 | 0.23 | 385.19 | 0.4 | 54   | 2.42  |
| 212 | 0.23 | 385.19 | 0.5 | 54.6 | 5.09  |
| 213 | 0.23 | 385.19 | 0.6 | 56   | 9.10  |
| 214 | 0.23 | 385.19 | 0.7 | 57.4 | 12.86 |
| 215 | 0.23 | 385.19 | 0.8 | 59.3 | 17.45 |
| 216 | 0.23 | 385.19 | 0.9 | 61.5 | 22.49 |
| 217 | 0.23 | 413.58 | 0.1 | 57.6 | 1.42  |
| 218 | 0.23 | 413.58 | 0.2 | 55.6 | 1.36  |
| 219 | 0.23 | 413.58 | 0.3 | 54.8 | 2.27  |
| 220 | 0.23 | 413.58 | 0.4 | 54.9 | 4.33  |
| 221 | 0.23 | 413.58 | 0.5 | 53.8 | 3.42  |
| 222 | 0.23 | 413.58 | 0.6 | 55.5 | 8.07  |
| 223 | 0.23 | 413.58 | 0.7 | 58   | 14.08 |
| 224 | 0.23 | 413.58 | 0.8 | 59.1 | 17.04 |
| 225 | 0.23 | 413.58 | 0.9 | 63.1 | 25.71 |
| 226 | 0.23 | 441.98 | 0.1 | 57.4 | 0.96  |
| 227 | 0.23 | 441.98 | 0.2 | 56   | 2.25  |
| 228 | 0.23 | 441.98 | 0.3 | 55.2 | 3.13  |
| 229 | 0.23 | 441.98 | 0.4 | 54.1 | 2.63  |
| 230 | 0.23 | 441.98 | 0.5 | 54.8 | 5.51  |
| 231 | 0.23 | 441.98 | 0.6 | 57   | 11.16 |
| 232 | 0.23 | 441.98 | 0.7 | 57.9 | 13.88 |
| 233 | 0.23 | 441.98 | 0.8 | 61.9 | 22.72 |
| 234 | 0.23 | 441.98 | 0.9 | 63.4 | 26.31 |
| 235 | 0.23 | 470.37 | 0.1 | 57.5 | 1.19  |
| 236 | 0.23 | 470.37 | 0.2 | 55.8 | 1.81  |
| 237 | 0.23 | 470.37 | 0.3 | 55   | 2.70  |
| 238 | 0.23 | 470.37 | 0.4 | 54.5 | 3.48  |
| 239 | 0.23 | 470.37 | 0.5 | 54.9 | 5.72  |
| 240 | 0.23 | 470.37 | 0.6 | 56.9 | 10.96 |
| 241 | 0.23 | 470.37 | 0.7 | 58.4 | 14.90 |
| 242 | 0.23 | 470.37 | 0.8 | 63   | 24.95 |
| 243 | 0.23 | 470.37 | 0.9 | 66.8 | 33.16 |



|     |      |        |     |      |       |
|-----|------|--------|-----|------|-------|
| 244 | 0.23 | 498.77 | 0.1 | 57.6 | 1.42  |
| 245 | 0.23 | 498.77 | 0.2 | 55.9 | 2.03  |
| 246 | 0.23 | 498.77 | 0.3 | 54.4 | 1.40  |
| 247 | 0.23 | 498.77 | 0.4 | 54.4 | 3.27  |
| 248 | 0.23 | 498.77 | 0.5 | 55.3 | 6.55  |
| 249 | 0.23 | 498.77 | 0.6 | 56.8 | 10.75 |
| 250 | 0.23 | 498.77 | 0.7 | 60.6 | 19.40 |
| 251 | 0.23 | 498.77 | 0.8 | 64.3 | 27.59 |
| 252 | 0.23 | 498.77 | 0.9 | 66.6 | 32.76 |
| 253 | 0.23 | 527.16 | 0.1 | 57.8 | 1.89  |
| 254 | 0.23 | 527.16 | 0.2 | 55.8 | 1.81  |
| 255 | 0.23 | 527.16 | 0.3 | 55.3 | 3.35  |
| 256 | 0.23 | 527.16 | 0.4 | 54.4 | 3.27  |
| 257 | 0.23 | 527.16 | 0.5 | 56.6 | 9.27  |
| 258 | 0.23 | 527.16 | 0.6 | 59.5 | 16.33 |
| 259 | 0.23 | 527.16 | 0.7 | 61.5 | 21.24 |
| 260 | 0.23 | 527.16 | 0.8 | 64.9 | 28.81 |
| 261 | 0.23 | 527.16 | 0.9 | 67.9 | 35.37 |
| 262 | 0.23 | 555.56 | 0.1 | 57.5 | 1.19  |
| 263 | 0.23 | 555.56 | 0.2 | 55.8 | 1.81  |
| 264 | 0.23 | 555.56 | 0.3 | 54.9 | 2.48  |
| 265 | 0.23 | 555.56 | 0.4 | 54.4 | 3.27  |
| 266 | 0.23 | 555.56 | 0.5 | 56.2 | 8.43  |
| 267 | 0.23 | 555.56 | 0.6 | 58   | 13.23 |
| 268 | 0.23 | 555.56 | 0.7 | 62   | 22.27 |
| 269 | 0.23 | 555.56 | 0.8 | 65.6 | 30.23 |
| 270 | 0.23 | 555.56 | 0.9 | 67.2 | 33.97 |
| 271 | 0.34 | 300    | 0.1 | 57.8 | 1.89  |
| 272 | 0.34 | 300    | 0.2 | 55.9 | 2.03  |
| 273 | 0.34 | 300    | 0.3 | 54   | 0.54  |
| 274 | 0.34 | 300    | 0.4 | 54.3 | 3.05  |
| 275 | 0.34 | 300    | 0.5 | 53.5 | 2.79  |
| 276 | 0.34 | 300    | 0.6 | 52.9 | 2.69  |
| 277 | 0.34 | 300    | 0.7 | 54.9 | 7.74  |
| 278 | 0.34 | 300    | 0.8 | 53.7 | 6.09  |
| 279 | 0.34 | 300    | 0.9 | 55.8 | 11.01 |
| 280 | 0.34 | 328.40 | 0.1 | 57.4 | 0.96  |
| 281 | 0.34 | 328.40 | 0.2 | 56.1 | 2.48  |
| 282 | 0.34 | 328.40 | 0.3 | 54.7 | 2.05  |
| 283 | 0.34 | 328.40 | 0.4 | 53.8 | 1.99  |
| 284 | 0.34 | 328.40 | 0.5 | 53.6 | 3.00  |
| 285 | 0.34 | 328.40 | 0.6 | 53.5 | 3.93  |
| 286 | 0.34 | 328.40 | 0.7 | 54.2 | 6.31  |
| 287 | 0.34 | 328.40 | 0.8 | 55.3 | 9.34  |
| 288 | 0.34 | 328.40 | 0.9 | 56.7 | 12.83 |
| 289 | 0.34 | 356.79 | 0.1 | 57.7 | 1.65  |
| 290 | 0.34 | 356.79 | 0.2 | 55.6 | 1.36  |
| 291 | 0.34 | 356.79 | 0.3 | 53.9 | 0.32  |
| 292 | 0.34 | 356.79 | 0.4 | 54.3 | 3.05  |
| 293 | 0.34 | 356.79 | 0.5 | 53.2 | 2.16  |
| 294 | 0.34 | 356.79 | 0.6 | 54.3 | 5.59  |
| 295 | 0.34 | 356.79 | 0.7 | 54.8 | 7.54  |
| 296 | 0.34 | 356.79 | 0.8 | 53.9 | 6.50  |
| 297 | 0.34 | 356.79 | 0.9 | 55.8 | 11.01 |

|     |      |        |     |      |       |
|-----|------|--------|-----|------|-------|
| 298 | 0.34 | 385.19 | 0.1 | 57.4 | 0.96  |
| 299 | 0.34 | 385.19 | 0.2 | 55.5 | 1.14  |
| 300 | 0.34 | 385.19 | 0.3 | 53.8 | 0.11  |
| 301 | 0.34 | 385.19 | 0.4 | 53.8 | 1.99  |
| 302 | 0.34 | 385.19 | 0.5 | 53.4 | 2.58  |
| 303 | 0.34 | 385.19 | 0.6 | 53.8 | 4.55  |
| 304 | 0.34 | 385.19 | 0.7 | 55   | 7.95  |
| 305 | 0.34 | 385.19 | 0.8 | 56.2 | 11.16 |
| 306 | 0.34 | 385.19 | 0.9 | 59.8 | 19.07 |
| 307 | 0.34 | 413.58 | 0.1 | 58.4 | 3.28  |
| 308 | 0.34 | 413.58 | 0.2 | 55.9 | 2.03  |
| 309 | 0.34 | 413.58 | 0.3 | 54.6 | 1.84  |
| 310 | 0.34 | 413.58 | 0.4 | 54.2 | 2.84  |
| 311 | 0.34 | 413.58 | 0.5 | 54.3 | 4.46  |
| 312 | 0.34 | 413.58 | 0.6 | 54.9 | 6.83  |
| 313 | 0.34 | 413.58 | 0.7 | 55.5 | 8.97  |
| 314 | 0.34 | 413.58 | 0.8 | 56.8 | 12.38 |
| 315 | 0.34 | 413.58 | 0.9 | 59.5 | 18.46 |
| 316 | 0.34 | 441.98 | 0.1 | 57.6 | 1.42  |
| 317 | 0.34 | 441.98 | 0.2 | 55.8 | 1.81  |
| 318 | 0.34 | 441.98 | 0.3 | 54   | 0.54  |
| 319 | 0.34 | 441.98 | 0.4 | 54.7 | 3.90  |
| 320 | 0.34 | 441.98 | 0.5 | 54.2 | 4.25  |
| 321 | 0.34 | 441.98 | 0.6 | 55.6 | 8.27  |
| 322 | 0.34 | 441.98 | 0.7 | 57.4 | 12.86 |
| 323 | 0.34 | 441.98 | 0.8 | 58.1 | 15.01 |
| 324 | 0.34 | 441.98 | 0.9 | 58.7 | 16.85 |
| 325 | 0.34 | 470.37 | 0.1 | 58.2 | 2.82  |
| 326 | 0.34 | 470.37 | 0.2 | 56.4 | 3.14  |
| 327 | 0.34 | 470.37 | 0.3 | 54.6 | 1.84  |
| 328 | 0.34 | 470.37 | 0.4 | 53.9 | 2.21  |
| 329 | 0.34 | 470.37 | 0.5 | 54.6 | 5.09  |
| 330 | 0.34 | 470.37 | 0.6 | 55.2 | 7.45  |
| 331 | 0.34 | 470.37 | 0.7 | 57.3 | 12.65 |
| 332 | 0.34 | 470.37 | 0.8 | 59   | 16.84 |
| 333 | 0.34 | 470.37 | 0.9 | 61.5 | 22.49 |
| 334 | 0.34 | 498.77 | 0.1 | 57.4 | 0.96  |
| 335 | 0.34 | 498.77 | 0.2 | 55.8 | 1.81  |
| 336 | 0.34 | 498.77 | 0.3 | 54.5 | 1.62  |
| 337 | 0.34 | 498.77 | 0.4 | 53.6 | 1.57  |
| 338 | 0.34 | 498.77 | 0.5 | 55   | 5.93  |
| 339 | 0.34 | 498.77 | 0.6 | 56.2 | 9.51  |
| 340 | 0.34 | 498.77 | 0.7 | 57.1 | 12.24 |
| 341 | 0.34 | 498.77 | 0.8 | 60.4 | 19.68 |
| 342 | 0.34 | 498.77 | 0.9 | 61.2 | 21.89 |
| 343 | 0.34 | 527.16 | 0.1 | 58.2 | 2.82  |
| 344 | 0.34 | 527.16 | 0.2 | 55.3 | 0.70  |
| 345 | 0.34 | 527.16 | 0.3 | 55   | 2.70  |
| 346 | 0.34 | 527.16 | 0.4 | 54.7 | 3.90  |
| 347 | 0.34 | 527.16 | 0.5 | 55.2 | 6.34  |
| 348 | 0.34 | 527.16 | 0.6 | 55.5 | 8.07  |
| 349 | 0.34 | 527.16 | 0.7 | 58.9 | 15.93 |
| 350 | 0.34 | 527.16 | 0.8 | 60.8 | 20.49 |
| 351 | 0.34 | 527.16 | 0.9 | 62.4 | 24.30 |

|     |      |        |     |      |       |
|-----|------|--------|-----|------|-------|
| 352 | 0.34 | 555.56 | 0.1 | 58   | 2.35  |
| 353 | 0.34 | 555.56 | 0.2 | 55.3 | 0.70  |
| 354 | 0.34 | 555.56 | 0.3 | 55   | 2.70  |
| 355 | 0.34 | 555.56 | 0.4 | 54.4 | 3.27  |
| 356 | 0.34 | 555.56 | 0.5 | 54.4 | 4.67  |
| 357 | 0.34 | 555.56 | 0.6 | 56.7 | 10.54 |
| 358 | 0.34 | 555.56 | 0.7 | 59.3 | 16.74 |
| 359 | 0.34 | 555.56 | 0.8 | 61.2 | 21.30 |
| 360 | 0.34 | 555.56 | 0.9 | 63   | 25.51 |
| 361 | 0.45 | 300    | 0.1 | 58.6 | 3.75  |
| 362 | 0.45 | 300    | 0.2 | 55.1 | 0.25  |
| 363 | 0.45 | 300    | 0.3 | 53.9 | 0.32  |
| 364 | 0.45 | 300    | 0.4 | 54   | 2.42  |
| 365 | 0.45 | 300    | 0.5 | 52.9 | 1.54  |
| 366 | 0.45 | 300    | 0.6 | 52.5 | 1.87  |
| 367 | 0.45 | 300    | 0.7 | 51.6 | 0.99  |
| 368 | 0.45 | 300    | 0.8 | 53.4 | 5.48  |
| 369 | 0.45 | 300    | 0.9 | 53.6 | 6.59  |
| 370 | 0.45 | 328.40 | 0.1 | 58   | 2.35  |
| 371 | 0.45 | 328.40 | 0.2 | 56.3 | 2.92  |
| 372 | 0.45 | 328.40 | 0.3 | 54.4 | 1.40  |
| 373 | 0.45 | 328.40 | 0.4 | 54.1 | 2.63  |
| 374 | 0.45 | 328.40 | 0.5 | 54   | 3.84  |
| 375 | 0.45 | 328.40 | 0.6 | 53.4 | 3.73  |
| 376 | 0.45 | 328.40 | 0.7 | 53.4 | 4.68  |
| 377 | 0.45 | 328.40 | 0.8 | 54   | 6.70  |
| 378 | 0.45 | 328.40 | 0.9 | 53.3 | 5.98  |
| 379 | 0.45 | 356.79 | 0.1 | 58   | 2.35  |
| 380 | 0.45 | 356.79 | 0.2 | 55.5 | 1.14  |
| 381 | 0.45 | 356.79 | 0.3 | 53.9 | 0.32  |
| 382 | 0.45 | 356.79 | 0.4 | 53.9 | 2.21  |
| 383 | 0.45 | 356.79 | 0.5 | 52.3 | 0.28  |
| 384 | 0.45 | 356.79 | 0.6 | 52.7 | 2.28  |
| 385 | 0.45 | 356.79 | 0.7 | 53.2 | 4.27  |
| 386 | 0.45 | 356.79 | 0.8 | 55.3 | 9.34  |
| 387 | 0.45 | 356.79 | 0.9 | 56   | 11.42 |
| 388 | 0.45 | 385.19 | 0.1 | 57.8 | 1.89  |
| 389 | 0.45 | 385.19 | 0.2 | 54.9 | -0.19 |
| 390 | 0.45 | 385.19 | 0.3 | 54   | 0.54  |
| 391 | 0.45 | 385.19 | 0.4 | 53.6 | 1.57  |
| 392 | 0.45 | 385.19 | 0.5 | 53.1 | 1.95  |
| 393 | 0.45 | 385.19 | 0.6 | 53.7 | 4.35  |
| 394 | 0.45 | 385.19 | 0.7 | 54.1 | 6.11  |
| 395 | 0.45 | 385.19 | 0.8 | 55.3 | 9.34  |
| 396 | 0.45 | 385.19 | 0.9 | 55.9 | 11.22 |
| 397 | 0.45 | 413.58 | 0.1 | 57.8 | 1.89  |
| 398 | 0.45 | 413.58 | 0.2 | 55.9 | 2.03  |
| 399 | 0.45 | 413.58 | 0.3 | 55   | 2.70  |
| 400 | 0.45 | 413.58 | 0.4 | 53.9 | 2.21  |
| 401 | 0.45 | 413.58 | 0.5 | 52.4 | 0.49  |
| 402 | 0.45 | 413.58 | 0.6 | 53.3 | 3.52  |
| 403 | 0.45 | 413.58 | 0.7 | 54.3 | 6.52  |
| 404 | 0.45 | 413.58 | 0.8 | 55.3 | 9.34  |
| 405 | 0.45 | 413.58 | 0.9 | 56.9 | 13.23 |

|     |      |        |     |      |       |
|-----|------|--------|-----|------|-------|
| 406 | 0.45 | 441.98 | 0.1 | 57.5 | 1.19  |
| 407 | 0.45 | 441.98 | 0.2 | 55.5 | 1.14  |
| 408 | 0.45 | 441.98 | 0.3 | 54.7 | 2.05  |
| 409 | 0.45 | 441.98 | 0.4 | 53.5 | 1.36  |
| 410 | 0.45 | 441.98 | 0.5 | 53.7 | 3.21  |
| 411 | 0.45 | 441.98 | 0.6 | 54   | 4.97  |
| 412 | 0.45 | 441.98 | 0.7 | 54.2 | 6.31  |
| 413 | 0.45 | 441.98 | 0.8 | 56.7 | 12.18 |
| 414 | 0.45 | 441.98 | 0.9 | 57.6 | 14.64 |
| 415 | 0.45 | 470.37 | 0.1 | 58   | 2.35  |
| 416 | 0.45 | 470.37 | 0.2 | 56   | 2.25  |
| 417 | 0.45 | 470.37 | 0.3 | 54.7 | 2.05  |
| 418 | 0.45 | 470.37 | 0.4 | 54.2 | 2.84  |
| 419 | 0.45 | 470.37 | 0.5 | 54   | 3.84  |
| 420 | 0.45 | 470.37 | 0.6 | 54.5 | 6.00  |
| 421 | 0.45 | 470.37 | 0.7 | 55.9 | 9.79  |
| 422 | 0.45 | 470.37 | 0.8 | 57.7 | 14.20 |
| 423 | 0.45 | 470.37 | 0.9 | 59.2 | 17.86 |
| 424 | 0.45 | 498.77 | 0.1 | 58.3 | 3.05  |
| 425 | 0.45 | 498.77 | 0.2 | 55.5 | 1.14  |
| 426 | 0.45 | 498.77 | 0.3 | 54.9 | 2.48  |
| 427 | 0.45 | 498.77 | 0.4 | 53.7 | 1.78  |
| 428 | 0.45 | 498.77 | 0.5 | 53.6 | 3.00  |
| 429 | 0.45 | 498.77 | 0.6 | 55.9 | 8.89  |
| 430 | 0.45 | 498.77 | 0.7 | 55.8 | 9.58  |
| 431 | 0.45 | 498.77 | 0.8 | 58.5 | 15.83 |
| 432 | 0.45 | 498.77 | 0.9 | 60   | 19.47 |
| 433 | 0.45 | 527.16 | 0.1 | 57.6 | 1.42  |
| 434 | 0.45 | 527.16 | 0.2 | 56   | 2.25  |
| 435 | 0.45 | 527.16 | 0.3 | 54.1 | 0.75  |
| 436 | 0.45 | 527.16 | 0.4 | 53.7 | 1.78  |
| 437 | 0.45 | 527.16 | 0.5 | 54.5 | 4.88  |
| 438 | 0.45 | 527.16 | 0.6 | 55.5 | 8.07  |
| 439 | 0.45 | 527.16 | 0.7 | 56   | 9.99  |
| 440 | 0.45 | 527.16 | 0.8 | 57.9 | 14.61 |
| 441 | 0.45 | 527.16 | 0.9 | 59.8 | 19.07 |
| 442 | 0.45 | 555.56 | 0.1 | 57.8 | 1.89  |
| 443 | 0.45 | 555.56 | 0.2 | 56.1 | 2.48  |
| 444 | 0.45 | 555.56 | 0.3 | 54.3 | 1.19  |
| 445 | 0.45 | 555.56 | 0.4 | 54   | 2.42  |
| 446 | 0.45 | 555.56 | 0.5 | 54   | 3.84  |
| 447 | 0.45 | 555.56 | 0.6 | 55.5 | 8.07  |
| 448 | 0.45 | 555.56 | 0.7 | 57.8 | 13.68 |
| 449 | 0.45 | 555.56 | 0.8 | 58.5 | 15.83 |
| 450 | 0.45 | 555.56 | 0.9 | 62.2 | 23.90 |
| 451 | 0.56 | 300    | 0.1 | 57.6 | 1.42  |
| 452 | 0.56 | 300    | 0.2 | 55.6 | 1.36  |
| 453 | 0.56 | 300    | 0.3 | 54   | 0.54  |
| 454 | 0.56 | 300    | 0.4 | 54.1 | 2.63  |
| 455 | 0.56 | 300    | 0.5 | 53.3 | 2.37  |
| 456 | 0.56 | 300    | 0.6 | 53   | 2.90  |
| 457 | 0.56 | 300    | 0.7 | 53.1 | 4.06  |
| 458 | 0.56 | 300    | 0.8 | 53.7 | 6.09  |
| 459 | 0.56 | 300    | 0.9 | 53.2 | 5.78  |

|     |      |        |     |      |       |
|-----|------|--------|-----|------|-------|
| 460 | 0.56 | 328.40 | 0.1 | 57.4 | 0.96  |
| 461 | 0.56 | 328.40 | 0.2 | 55.9 | 2.03  |
| 462 | 0.56 | 328.40 | 0.3 | 54.5 | 1.62  |
| 463 | 0.56 | 328.40 | 0.4 | 53.8 | 1.99  |
| 464 | 0.56 | 328.40 | 0.5 | 52.7 | 1.12  |
| 465 | 0.56 | 328.40 | 0.6 | 53.1 | 3.11  |
| 466 | 0.56 | 328.40 | 0.7 | 53   | 3.86  |
| 467 | 0.56 | 328.40 | 0.8 | 53.8 | 6.29  |
| 468 | 0.56 | 328.40 | 0.9 | 53.6 | 6.59  |
| 469 | 0.56 | 356.79 | 0.1 | 57.7 | 1.65  |
| 470 | 0.56 | 356.79 | 0.2 | 55.8 | 1.81  |
| 471 | 0.56 | 356.79 | 0.3 | 54.5 | 1.62  |
| 472 | 0.56 | 356.79 | 0.4 | 53.5 | 1.36  |
| 473 | 0.56 | 356.79 | 0.5 | 53.7 | 3.21  |
| 474 | 0.56 | 356.79 | 0.6 | 53   | 2.90  |
| 475 | 0.56 | 356.79 | 0.7 | 53   | 3.86  |
| 476 | 0.56 | 356.79 | 0.8 | 52.7 | 4.06  |
| 477 | 0.56 | 356.79 | 0.9 | 53.9 | 7.19  |
| 478 | 0.56 | 385.19 | 0.1 | 57.9 | 2.12  |
| 479 | 0.56 | 385.19 | 0.2 | 56   | 2.25  |
| 480 | 0.56 | 385.19 | 0.3 | 54.6 | 1.84  |
| 481 | 0.56 | 385.19 | 0.4 | 54   | 2.42  |
| 482 | 0.56 | 385.19 | 0.5 | 53.5 | 2.79  |
| 483 | 0.56 | 385.19 | 0.6 | 53.5 | 3.93  |
| 484 | 0.56 | 385.19 | 0.7 | 54   | 5.90  |
| 485 | 0.56 | 385.19 | 0.8 | 54.5 | 7.71  |
| 486 | 0.56 | 385.19 | 0.9 | 55.3 | 10.01 |
| 487 | 0.56 | 413.58 | 0.1 | 57.4 | 0.96  |
| 488 | 0.56 | 413.58 | 0.2 | 55.6 | 1.36  |
| 489 | 0.56 | 413.58 | 0.3 | 54.3 | 1.19  |
| 490 | 0.56 | 413.58 | 0.4 | 53.7 | 1.78  |
| 491 | 0.56 | 413.58 | 0.5 | 53.7 | 3.21  |
| 492 | 0.56 | 413.58 | 0.6 | 54.2 | 5.38  |
| 493 | 0.56 | 413.58 | 0.7 | 53.6 | 5.08  |
| 494 | 0.56 | 413.58 | 0.8 | 54.7 | 8.12  |
| 495 | 0.56 | 413.58 | 0.9 | 55.3 | 10.01 |
| 496 | 0.56 | 441.98 | 0.1 | 57.4 | 0.96  |
| 497 | 0.56 | 441.98 | 0.2 | 56.3 | 2.92  |
| 498 | 0.56 | 441.98 | 0.3 | 54.7 | 2.05  |
| 499 | 0.56 | 441.98 | 0.4 | 54.3 | 3.05  |
| 500 | 0.56 | 441.98 | 0.5 | 54   | 3.84  |
| 501 | 0.56 | 441.98 | 0.6 | 54   | 4.97  |
| 502 | 0.56 | 441.98 | 0.7 | 54.5 | 6.93  |
| 503 | 0.56 | 441.98 | 0.8 | 55.5 | 9.74  |
| 504 | 0.56 | 441.98 | 0.9 | 57.1 | 13.63 |
| 505 | 0.56 | 470.37 | 0.1 | 57.7 | 1.65  |
| 506 | 0.56 | 470.37 | 0.2 | 55.7 | 1.59  |
| 507 | 0.56 | 470.37 | 0.3 | 55.2 | 3.13  |
| 508 | 0.56 | 470.37 | 0.4 | 54.3 | 3.05  |
| 509 | 0.56 | 470.37 | 0.5 | 53.8 | 3.42  |
| 510 | 0.56 | 470.37 | 0.6 | 54   | 4.97  |
| 511 | 0.56 | 470.37 | 0.7 | 54.5 | 6.93  |
| 512 | 0.56 | 470.37 | 0.8 | 56.6 | 11.97 |
| 513 | 0.56 | 470.37 | 0.9 | 56.2 | 11.82 |

|     |      |        |     |      |       |
|-----|------|--------|-----|------|-------|
| 514 | 0.56 | 498.77 | 0.1 | 57.7 | 1.65  |
| 515 | 0.56 | 498.77 | 0.2 | 56   | 2.25  |
| 516 | 0.56 | 498.77 | 0.3 | 54.3 | 1.19  |
| 517 | 0.56 | 498.77 | 0.4 | 53.5 | 1.36  |
| 518 | 0.56 | 498.77 | 0.5 | 53.8 | 3.42  |
| 519 | 0.56 | 498.77 | 0.6 | 54   | 4.97  |
| 520 | 0.56 | 498.77 | 0.7 | 55.2 | 8.36  |
| 521 | 0.56 | 498.77 | 0.8 | 55.9 | 10.55 |
| 522 | 0.56 | 498.77 | 0.9 | 57.3 | 14.03 |
| 523 | 0.56 | 527.16 | 0.1 | 57.7 | 1.65  |
| 524 | 0.56 | 527.16 | 0.2 | 55.9 | 2.03  |
| 525 | 0.56 | 527.16 | 0.3 | 54.7 | 2.05  |
| 526 | 0.56 | 527.16 | 0.4 | 54.1 | 2.63  |
| 527 | 0.56 | 527.16 | 0.5 | 54.3 | 4.46  |
| 528 | 0.56 | 527.16 | 0.6 | 55   | 7.03  |
| 529 | 0.56 | 527.16 | 0.7 | 55.3 | 8.56  |
| 530 | 0.56 | 527.16 | 0.8 | 56.9 | 12.58 |
| 531 | 0.56 | 527.16 | 0.9 | 57.1 | 13.63 |
| 532 | 0.56 | 555.56 | 0.1 | 57.5 | 1.19  |
| 533 | 0.56 | 555.56 | 0.2 | 55   | 0.03  |
| 534 | 0.56 | 555.56 | 0.3 | 53.9 | 0.32  |
| 535 | 0.56 | 555.56 | 0.4 | 53.8 | 1.99  |
| 536 | 0.56 | 555.56 | 0.5 | 54.1 | 4.04  |
| 537 | 0.56 | 555.56 | 0.6 | 54.3 | 5.59  |
| 538 | 0.56 | 555.56 | 0.7 | 56.6 | 11.22 |
| 539 | 0.56 | 555.56 | 0.8 | 57   | 12.78 |
| 540 | 0.56 | 555.56 | 0.9 | 57.2 | 13.83 |
| 541 | 0.67 | 300    | 0.1 | 57.6 | 1.42  |
| 542 | 0.67 | 300    | 0.2 | 55.9 | 2.03  |
| 543 | 0.67 | 300    | 0.3 | 53.8 | 0.11  |
| 544 | 0.67 | 300    | 0.4 | 53.4 | 1.15  |
| 545 | 0.67 | 300    | 0.5 | 53   | 1.75  |
| 546 | 0.67 | 300    | 0.6 | 52   | 0.83  |
| 547 | 0.67 | 300    | 0.7 | 52.2 | 2.22  |
| 548 | 0.67 | 300    | 0.8 | 52.6 | 3.86  |
| 549 | 0.67 | 300    | 0.9 | 51.8 | 2.96  |
| 550 | 0.67 | 328.40 | 0.1 | 57.5 | 1.19  |
| 551 | 0.67 | 328.40 | 0.2 | 55.5 | 1.14  |
| 552 | 0.67 | 328.40 | 0.3 | 54.6 | 1.84  |
| 553 | 0.67 | 328.40 | 0.4 | 53.7 | 1.78  |
| 554 | 0.67 | 328.40 | 0.5 | 53.5 | 2.79  |
| 555 | 0.67 | 328.40 | 0.6 | 52.5 | 1.87  |
| 556 | 0.67 | 328.40 | 0.7 | 52.2 | 2.22  |
| 557 | 0.67 | 328.40 | 0.8 | 52.9 | 4.47  |
| 558 | 0.67 | 328.40 | 0.9 | 53.6 | 6.59  |
| 559 | 0.67 | 356.79 | 0.1 | 58.4 | 3.28  |
| 560 | 0.67 | 356.79 | 0.2 | 55.9 | 2.03  |
| 561 | 0.67 | 356.79 | 0.3 | 53.9 | 0.32  |
| 562 | 0.67 | 356.79 | 0.4 | 54.4 | 3.27  |
| 563 | 0.67 | 356.79 | 0.5 | 53.2 | 2.16  |
| 564 | 0.67 | 356.79 | 0.6 | 52   | 0.83  |
| 565 | 0.67 | 356.79 | 0.7 | 54.3 | 6.52  |
| 566 | 0.67 | 356.79 | 0.8 | 53.1 | 4.87  |
| 567 | 0.67 | 356.79 | 0.9 | 52.9 | 5.18  |

|     |      |        |     |      |       |
|-----|------|--------|-----|------|-------|
| 568 | 0.67 | 385.19 | 0.1 | 58.3 | 3.05  |
| 569 | 0.67 | 385.19 | 0.2 | 55.6 | 1.36  |
| 570 | 0.67 | 385.19 | 0.3 | 55   | 2.70  |
| 571 | 0.67 | 385.19 | 0.4 | 53.8 | 1.99  |
| 572 | 0.67 | 385.19 | 0.5 | 52.9 | 1.54  |
| 573 | 0.67 | 385.19 | 0.6 | 52.9 | 2.69  |
| 574 | 0.67 | 385.19 | 0.7 | 53   | 3.86  |
| 575 | 0.67 | 385.19 | 0.8 | 54.1 | 6.90  |
| 576 | 0.67 | 385.19 | 0.9 | 53.2 | 5.78  |
| 577 | 0.67 | 413.58 | 0.1 | 57.4 | 0.96  |
| 578 | 0.67 | 413.58 | 0.2 | 55.9 | 2.03  |
| 579 | 0.67 | 413.58 | 0.3 | 54.8 | 2.27  |
| 580 | 0.67 | 413.58 | 0.4 | 54.5 | 3.48  |
| 581 | 0.67 | 413.58 | 0.5 | 53.5 | 2.79  |
| 582 | 0.67 | 413.58 | 0.6 | 53   | 2.90  |
| 583 | 0.67 | 413.58 | 0.7 | 52.6 | 3.04  |
| 584 | 0.67 | 413.58 | 0.8 | 54.7 | 8.12  |
| 585 | 0.67 | 413.58 | 0.9 | 55   | 9.40  |
| 586 | 0.67 | 441.98 | 0.1 | 58.3 | 3.05  |
| 587 | 0.67 | 441.98 | 0.2 | 56   | 2.25  |
| 588 | 0.67 | 441.98 | 0.3 | 54.3 | 1.19  |
| 589 | 0.67 | 441.98 | 0.4 | 54   | 2.42  |
| 590 | 0.67 | 441.98 | 0.5 | 52.6 | 0.91  |
| 591 | 0.67 | 441.98 | 0.6 | 53   | 2.90  |
| 592 | 0.67 | 441.98 | 0.7 | 53.9 | 5.70  |
| 593 | 0.67 | 441.98 | 0.8 | 54.3 | 7.31  |
| 594 | 0.67 | 441.98 | 0.9 | 55.7 | 10.81 |
| 595 | 0.67 | 470.37 | 0.1 | 58.3 | 3.05  |
| 596 | 0.67 | 470.37 | 0.2 | 56.1 | 2.48  |
| 597 | 0.67 | 470.37 | 0.3 | 54.4 | 1.40  |
| 598 | 0.67 | 470.37 | 0.4 | 54   | 2.42  |
| 599 | 0.67 | 470.37 | 0.5 | 53.5 | 2.79  |
| 600 | 0.67 | 470.37 | 0.6 | 53.3 | 3.52  |
| 601 | 0.67 | 470.37 | 0.7 | 53.4 | 4.68  |
| 602 | 0.67 | 470.37 | 0.8 | 55   | 8.73  |
| 603 | 0.67 | 470.37 | 0.9 | 56.3 | 12.02 |
| 604 | 0.67 | 498.77 | 0.1 | 57.7 | 1.65  |
| 605 | 0.67 | 498.77 | 0.2 | 55.8 | 1.81  |
| 606 | 0.67 | 498.77 | 0.3 | 54.2 | 0.97  |
| 607 | 0.67 | 498.77 | 0.4 | 53.6 | 1.57  |
| 608 | 0.67 | 498.77 | 0.5 | 53.4 | 2.58  |
| 609 | 0.67 | 498.77 | 0.6 | 52.9 | 2.69  |
| 610 | 0.67 | 498.77 | 0.7 | 53.5 | 4.88  |
| 611 | 0.67 | 498.77 | 0.8 | 55   | 8.73  |
| 612 | 0.67 | 498.77 | 0.9 | 56.4 | 12.22 |
| 613 | 0.67 | 527.16 | 0.1 | 58.3 | 3.05  |
| 614 | 0.67 | 527.16 | 0.2 | 55.7 | 1.59  |
| 615 | 0.67 | 527.16 | 0.3 | 54.4 | 1.40  |
| 616 | 0.67 | 527.16 | 0.4 | 54.1 | 2.63  |
| 617 | 0.67 | 527.16 | 0.5 | 53.9 | 3.63  |
| 618 | 0.67 | 527.16 | 0.6 | 53.4 | 3.73  |
| 619 | 0.67 | 527.16 | 0.7 | 54.3 | 6.52  |
| 620 | 0.67 | 527.16 | 0.8 | 57.1 | 12.99 |
| 621 | 0.67 | 527.16 | 0.9 | 56   | 11.42 |

|     |      |        |     |      |       |
|-----|------|--------|-----|------|-------|
| 622 | 0.67 | 555.56 | 0.1 | 57.2 | 0.49  |
| 623 | 0.67 | 555.56 | 0.2 | 55   | 0.03  |
| 624 | 0.67 | 555.56 | 0.3 | 54.2 | 0.97  |
| 625 | 0.67 | 555.56 | 0.4 | 54.1 | 2.63  |
| 626 | 0.67 | 555.56 | 0.5 | 54.2 | 4.25  |
| 627 | 0.67 | 555.56 | 0.6 | 54.5 | 6.00  |
| 628 | 0.67 | 555.56 | 0.7 | 55.4 | 8.77  |
| 629 | 0.67 | 555.56 | 0.8 | 56   | 10.76 |
| 630 | 0.67 | 555.56 | 0.9 | 57.6 | 14.64 |
| 631 | 0.78 | 300    | 0.1 | 58.1 | 2.58  |
| 632 | 0.78 | 300    | 0.2 | 55.5 | 1.14  |
| 633 | 0.78 | 300    | 0.3 | 53.8 | 0.11  |
| 634 | 0.78 | 300    | 0.4 | 53.8 | 1.99  |
| 635 | 0.78 | 300    | 0.5 | 52.6 | 0.91  |
| 636 | 0.78 | 300    | 0.6 | 51.8 | 0.42  |
| 637 | 0.78 | 300    | 0.7 | 51.7 | 1.20  |
| 638 | 0.78 | 300    | 0.8 | 52.3 | 3.25  |
| 639 | 0.78 | 300    | 0.9 | 52.6 | 4.57  |
| 640 | 0.78 | 328.40 | 0.1 | 58.1 | 2.58  |
| 641 | 0.78 | 328.40 | 0.2 | 56.7 | 3.81  |
| 642 | 0.78 | 328.40 | 0.3 | 54.4 | 1.40  |
| 643 | 0.78 | 328.40 | 0.4 | 53.4 | 1.15  |
| 644 | 0.78 | 328.40 | 0.5 | 53   | 1.75  |
| 645 | 0.78 | 328.40 | 0.6 | 52.4 | 1.66  |
| 646 | 0.78 | 328.40 | 0.7 | 51.9 | 1.61  |
| 647 | 0.78 | 328.40 | 0.8 | 52.3 | 3.25  |
| 648 | 0.78 | 328.40 | 0.9 | 52.3 | 3.97  |
| 649 | 0.78 | 356.79 | 0.1 | 57.8 | 1.89  |
| 650 | 0.78 | 356.79 | 0.2 | 56   | 2.25  |
| 651 | 0.78 | 356.79 | 0.3 | 53.8 | 0.11  |
| 652 | 0.78 | 356.79 | 0.4 | 53.9 | 2.21  |
| 653 | 0.78 | 356.79 | 0.5 | 52.4 | 0.49  |
| 654 | 0.78 | 356.79 | 0.6 | 52.4 | 1.66  |
| 655 | 0.78 | 356.79 | 0.7 | 53   | 3.86  |
| 656 | 0.78 | 356.79 | 0.8 | 53.4 | 5.48  |
| 657 | 0.78 | 356.79 | 0.9 | 52.9 | 5.18  |
| 658 | 0.78 | 385.19 | 0.1 | 58.1 | 2.58  |
| 659 | 0.78 | 385.19 | 0.2 | 55.2 | 0.48  |
| 660 | 0.78 | 385.19 | 0.3 | 54.8 | 2.27  |
| 661 | 0.78 | 385.19 | 0.4 | 53.8 | 1.99  |
| 662 | 0.78 | 385.19 | 0.5 | 52.8 | 1.33  |
| 663 | 0.78 | 385.19 | 0.6 | 53.3 | 3.52  |
| 664 | 0.78 | 385.19 | 0.7 | 53.1 | 4.06  |
| 665 | 0.78 | 385.19 | 0.8 | 53.8 | 6.29  |
| 666 | 0.78 | 385.19 | 0.9 | 52.8 | 4.97  |
| 667 | 0.78 | 413.58 | 0.1 | 58.1 | 2.58  |
| 668 | 0.78 | 413.58 | 0.2 | 55.8 | 1.81  |
| 669 | 0.78 | 413.58 | 0.3 | 54.4 | 1.40  |
| 670 | 0.78 | 413.58 | 0.4 | 54.3 | 3.05  |
| 671 | 0.78 | 413.58 | 0.5 | 52.9 | 1.54  |
| 672 | 0.78 | 413.58 | 0.6 | 53.1 | 3.11  |
| 673 | 0.78 | 413.58 | 0.7 | 52.6 | 3.04  |
| 674 | 0.78 | 413.58 | 0.8 | 53.7 | 6.09  |
| 675 | 0.78 | 413.58 | 0.9 | 53.9 | 7.19  |



|     |      |        |     |      |       |
|-----|------|--------|-----|------|-------|
| 676 | 0.78 | 441.98 | 0.1 | 57.8 | 1.89  |
| 677 | 0.78 | 441.98 | 0.2 | 55.9 | 2.03  |
| 678 | 0.78 | 441.98 | 0.3 | 54.1 | 0.75  |
| 679 | 0.78 | 441.98 | 0.4 | 54.1 | 2.63  |
| 680 | 0.78 | 441.98 | 0.5 | 52.9 | 1.54  |
| 681 | 0.78 | 441.98 | 0.6 | 53.7 | 4.35  |
| 682 | 0.78 | 441.98 | 0.7 | 52.9 | 3.65  |
| 683 | 0.78 | 441.98 | 0.8 | 54.6 | 7.92  |
| 684 | 0.78 | 441.98 | 0.9 | 54.9 | 9.20  |
| 685 | 0.78 | 470.37 | 0.1 | 57.7 | 1.65  |
| 686 | 0.78 | 470.37 | 0.2 | 55.5 | 1.14  |
| 687 | 0.78 | 470.37 | 0.3 | 54.7 | 2.05  |
| 688 | 0.78 | 470.37 | 0.4 | 53.8 | 1.99  |
| 689 | 0.78 | 470.37 | 0.5 | 53.4 | 2.58  |
| 690 | 0.78 | 470.37 | 0.6 | 53.4 | 3.73  |
| 691 | 0.78 | 470.37 | 0.7 | 54.1 | 6.11  |
| 692 | 0.78 | 470.37 | 0.8 | 54.2 | 7.10  |
| 693 | 0.78 | 470.37 | 0.9 | 54.4 | 8.20  |
| 694 | 0.78 | 498.77 | 0.1 | 58.2 | 2.82  |
| 695 | 0.78 | 498.77 | 0.2 | 55.8 | 1.81  |
| 696 | 0.78 | 498.77 | 0.3 | 55.4 | 3.57  |
| 697 | 0.78 | 498.77 | 0.4 | 53.8 | 1.99  |
| 698 | 0.78 | 498.77 | 0.5 | 53   | 1.75  |
| 699 | 0.78 | 498.77 | 0.6 | 53.5 | 3.93  |
| 700 | 0.78 | 498.77 | 0.7 | 54.2 | 6.31  |
| 701 | 0.78 | 498.77 | 0.8 | 53.8 | 6.29  |
| 702 | 0.78 | 498.77 | 0.9 | 56   | 11.42 |
| 703 | 0.78 | 527.16 | 0.1 | 57.9 | 2.12  |
| 704 | 0.78 | 527.16 | 0.2 | 56   | 2.25  |
| 705 | 0.78 | 527.16 | 0.3 | 54.9 | 2.48  |
| 706 | 0.78 | 527.16 | 0.4 | 54.7 | 3.90  |
| 707 | 0.78 | 527.16 | 0.5 | 53.4 | 2.58  |
| 708 | 0.78 | 527.16 | 0.6 | 53.3 | 3.52  |
| 709 | 0.78 | 527.16 | 0.7 | 54.3 | 6.52  |
| 710 | 0.78 | 527.16 | 0.8 | 55.9 | 10.55 |
| 711 | 0.78 | 527.16 | 0.9 | 55.7 | 10.81 |
| 712 | 0.78 | 555.56 | 0.1 | 57.6 | 1.42  |
| 713 | 0.78 | 555.56 | 0.2 | 56   | 2.25  |
| 714 | 0.78 | 555.56 | 0.3 | 54   | 0.54  |
| 715 | 0.78 | 555.56 | 0.4 | 53.6 | 1.57  |
| 716 | 0.78 | 555.56 | 0.5 | 54   | 3.84  |
| 717 | 0.78 | 555.56 | 0.6 | 53.9 | 4.76  |
| 718 | 0.78 | 555.56 | 0.7 | 55.4 | 8.77  |
| 719 | 0.78 | 555.56 | 0.8 | 55.9 | 10.55 |
| 720 | 0.78 | 555.56 | 0.9 | 56.4 | 12.22 |
| 721 | 0.89 | 300    | 0.1 | 57.8 | 1.89  |
| 722 | 0.89 | 300    | 0.2 | 55.7 | 1.59  |
| 723 | 0.89 | 300    | 0.3 | 54.2 | 0.97  |
| 724 | 0.89 | 300    | 0.4 | 53.4 | 1.15  |
| 725 | 0.89 | 300    | 0.5 | 52.9 | 1.54  |
| 726 | 0.89 | 300    | 0.6 | 52.2 | 1.25  |
| 727 | 0.89 | 300    | 0.7 | 52.1 | 2.02  |
| 728 | 0.89 | 300    | 0.8 | 52.2 | 3.05  |
| 729 | 0.89 | 300    | 0.9 | 51.3 | 1.95  |

|     |      |        |     |      |      |
|-----|------|--------|-----|------|------|
| 730 | 0.89 | 328.40 | 0.1 | 58.3 | 3.05 |
| 731 | 0.89 | 328.40 | 0.2 | 55.8 | 1.81 |
| 732 | 0.89 | 328.40 | 0.3 | 54.5 | 1.62 |
| 733 | 0.89 | 328.40 | 0.4 | 53.6 | 1.57 |
| 734 | 0.89 | 328.40 | 0.5 | 52.5 | 0.70 |
| 735 | 0.89 | 328.40 | 0.6 | 51.9 | 0.63 |
| 736 | 0.89 | 328.40 | 0.7 | 51.6 | 0.99 |
| 737 | 0.89 | 328.40 | 0.8 | 52.4 | 3.45 |
| 738 | 0.89 | 328.40 | 0.9 | 51.3 | 1.95 |
| 739 | 0.89 | 356.79 | 0.1 | 57.4 | 0.96 |
| 740 | 0.89 | 356.79 | 0.2 | 55.5 | 1.14 |
| 741 | 0.89 | 356.79 | 0.3 | 54.3 | 1.19 |
| 742 | 0.89 | 356.79 | 0.4 | 53.1 | 0.51 |
| 743 | 0.89 | 356.79 | 0.5 | 54.4 | 4.67 |
| 744 | 0.89 | 356.79 | 0.6 | 52.4 | 1.66 |
| 745 | 0.89 | 356.79 | 0.7 | 52.2 | 2.22 |
| 746 | 0.89 | 356.79 | 0.8 | 52.6 | 3.86 |
| 747 | 0.89 | 356.79 | 0.9 | 53.4 | 6.18 |
| 748 | 0.89 | 385.19 | 0.1 | 58   | 2.35 |
| 749 | 0.89 | 385.19 | 0.2 | 55.6 | 1.36 |
| 750 | 0.89 | 385.19 | 0.3 | 54.5 | 1.62 |
| 751 | 0.89 | 385.19 | 0.4 | 53.8 | 1.99 |
| 752 | 0.89 | 385.19 | 0.5 | 53   | 1.75 |
| 753 | 0.89 | 385.19 | 0.6 | 52.7 | 2.28 |
| 754 | 0.89 | 385.19 | 0.7 | 51.9 | 1.61 |
| 755 | 0.89 | 385.19 | 0.8 | 52.5 | 3.66 |
| 756 | 0.89 | 385.19 | 0.9 | 54.3 | 7.99 |
| 757 | 0.89 | 413.58 | 0.1 | 58   | 2.35 |
| 758 | 0.89 | 413.58 | 0.2 | 56.2 | 2.70 |
| 759 | 0.89 | 413.58 | 0.3 | 54.8 | 2.27 |
| 760 | 0.89 | 413.58 | 0.4 | 53.4 | 1.14 |
| 761 | 0.89 | 413.58 | 0.5 | 52.6 | 0.91 |
| 762 | 0.89 | 413.58 | 0.6 | 52.4 | 1.66 |
| 763 | 0.89 | 413.58 | 0.7 | 52.6 | 3.04 |
| 764 | 0.89 | 413.58 | 0.8 | 53.5 | 5.68 |
| 765 | 0.89 | 413.58 | 0.9 | 53.7 | 6.79 |
| 766 | 0.89 | 441.98 | 0.1 | 57.8 | 1.89 |
| 767 | 0.89 | 441.98 | 0.2 | 56.1 | 2.48 |
| 768 | 0.89 | 441.98 | 0.3 | 54.1 | 0.75 |
| 769 | 0.89 | 441.98 | 0.4 | 53.3 | 0.93 |
| 770 | 0.89 | 441.98 | 0.5 | 53.4 | 2.58 |
| 771 | 0.89 | 441.98 | 0.6 | 52.7 | 2.28 |
| 772 | 0.89 | 441.98 | 0.7 | 52.9 | 3.65 |
| 773 | 0.89 | 441.98 | 0.8 | 53.8 | 6.29 |
| 774 | 0.89 | 441.98 | 0.9 | 53.6 | 6.59 |
| 775 | 0.89 | 470.37 | 0.1 | 57.8 | 1.89 |
| 776 | 0.89 | 470.37 | 0.2 | 55.9 | 2.03 |
| 777 | 0.89 | 470.37 | 0.3 | 54.5 | 1.62 |
| 778 | 0.89 | 470.37 | 0.4 | 53.3 | 0.93 |
| 779 | 0.89 | 470.37 | 0.5 | 52.5 | 0.70 |
| 780 | 0.89 | 470.37 | 0.6 | 53.7 | 4.35 |
| 781 | 0.89 | 470.37 | 0.7 | 53.4 | 4.68 |
| 782 | 0.89 | 470.37 | 0.8 | 54.1 | 6.90 |
| 783 | 0.89 | 470.37 | 0.9 | 54.4 | 8.20 |

|     |      |        |     |      |       |
|-----|------|--------|-----|------|-------|
| 784 | 0.89 | 498.77 | 0.1 | 57.9 | 2.12  |
| 785 | 0.89 | 498.77 | 0.2 | 55.5 | 1.14  |
| 786 | 0.89 | 498.77 | 0.3 | 54.4 | 1.40  |
| 787 | 0.89 | 498.77 | 0.4 | 53.4 | 1.14  |
| 788 | 0.89 | 498.77 | 0.5 | 53.3 | 2.37  |
| 789 | 0.89 | 498.77 | 0.6 | 53.4 | 3.73  |
| 790 | 0.89 | 498.77 | 0.7 | 53.4 | 4.68  |
| 791 | 0.89 | 498.77 | 0.8 | 53.6 | 5.89  |
| 792 | 0.89 | 498.77 | 0.9 | 54.3 | 7.99  |
| 793 | 0.89 | 527.16 | 0.1 | 57.8 | 1.89  |
| 794 | 0.89 | 527.16 | 0.2 | 56.2 | 2.70  |
| 795 | 0.89 | 527.16 | 0.3 | 54.2 | 0.97  |
| 796 | 0.89 | 527.16 | 0.4 | 53.5 | 1.36  |
| 797 | 0.89 | 527.16 | 0.5 | 53.4 | 2.58  |
| 798 | 0.89 | 527.16 | 0.6 | 53.4 | 3.73  |
| 799 | 0.89 | 527.16 | 0.7 | 53.6 | 5.08  |
| 800 | 0.89 | 527.16 | 0.8 | 54.4 | 7.51  |
| 801 | 0.89 | 527.16 | 0.9 | 54.7 | 8.80  |
| 802 | 0.89 | 555.56 | 0.1 | 57.8 | 1.89  |
| 803 | 0.89 | 555.56 | 0.2 | 55.5 | 1.14  |
| 804 | 0.89 | 555.56 | 0.3 | 54.7 | 2.05  |
| 805 | 0.89 | 555.56 | 0.4 | 54   | 2.42  |
| 806 | 0.89 | 555.56 | 0.5 | 54   | 3.84  |
| 807 | 0.89 | 555.56 | 0.6 | 53.7 | 4.35  |
| 808 | 0.89 | 555.56 | 0.7 | 54.6 | 7.13  |
| 809 | 0.89 | 555.56 | 0.8 | 55.1 | 8.93  |
| 810 | 0.89 | 555.56 | 0.9 | 55.5 | 10.41 |
| 811 | 1    | 300    | 0.1 | 58.3 | 3.05  |
| 812 | 1    | 300    | 0.2 | 54.8 | -0.41 |
| 813 | 1    | 300    | 0.3 | 54.4 | 1.40  |
| 814 | 1    | 300    | 0.4 | 53.3 | 0.93  |
| 815 | 1    | 300    | 0.5 | 52.7 | 1.12  |
| 816 | 1    | 300    | 0.6 | 52.3 | 1.45  |
| 817 | 1    | 300    | 0.7 | 52   | 1.81  |
| 818 | 1    | 300    | 0.8 | 51.4 | 1.43  |
| 819 | 1    | 300    | 0.9 | 51.6 | 2.56  |
| 820 | 1    | 328.40 | 0.1 | 57.3 | 0.72  |
| 821 | 1    | 328.40 | 0.2 | 56.1 | 2.48  |
| 822 | 1    | 328.40 | 0.3 | 54.8 | 2.27  |
| 823 | 1    | 328.40 | 0.4 | 54   | 2.42  |
| 824 | 1    | 328.40 | 0.5 | 53.1 | 1.95  |
| 825 | 1    | 328.40 | 0.6 | 51.8 | 0.42  |
| 826 | 1    | 328.40 | 0.7 | 52.2 | 2.22  |
| 827 | 1    | 328.40 | 0.8 | 51.8 | 2.24  |
| 828 | 1    | 328.40 | 0.9 | 52.2 | 3.77  |
| 829 | 1    | 356.79 | 0.1 | 58.2 | 2.82  |
| 830 | 1    | 356.79 | 0.2 | 55.3 | 0.70  |
| 831 | 1    | 356.79 | 0.3 | 54.5 | 1.62  |
| 832 | 1    | 356.79 | 0.4 | 53.7 | 1.78  |
| 833 | 1    | 356.79 | 0.5 | 53.1 | 1.95  |
| 834 | 1    | 356.79 | 0.6 | 52.5 | 1.87  |
| 835 | 1    | 356.79 | 0.7 | 52.5 | 2.83  |
| 836 | 1    | 356.79 | 0.8 | 52.1 | 2.85  |
| 837 | 1    | 356.79 | 0.9 | 52.2 | 3.77  |

|     |   |        |     |      |      |
|-----|---|--------|-----|------|------|
| 838 | 1 | 385.19 | 0.1 | 57.6 | 1.42 |
| 839 | 1 | 385.19 | 0.2 | 55.9 | 2.03 |
| 840 | 1 | 385.19 | 0.3 | 54.1 | 0.75 |
| 841 | 1 | 385.19 | 0.4 | 53.7 | 1.78 |
| 842 | 1 | 385.19 | 0.5 | 53.3 | 2.37 |
| 843 | 1 | 385.19 | 0.6 | 52.7 | 2.28 |
| 844 | 1 | 385.19 | 0.7 | 52.2 | 2.22 |
| 845 | 1 | 385.19 | 0.8 | 52.1 | 2.85 |
| 846 | 1 | 385.19 | 0.9 | 53.4 | 6.18 |
| 847 | 1 | 413.58 | 0.1 | 57.6 | 1.42 |
| 848 | 1 | 413.58 | 0.2 | 56   | 2.25 |
| 849 | 1 | 413.58 | 0.3 | 54.4 | 1.40 |
| 850 | 1 | 413.58 | 0.4 | 53.3 | 0.93 |
| 851 | 1 | 413.58 | 0.5 | 53.2 | 2.16 |
| 852 | 1 | 413.58 | 0.6 | 53.2 | 3.31 |
| 853 | 1 | 413.58 | 0.7 | 52.7 | 3.24 |
| 854 | 1 | 413.58 | 0.8 | 53.4 | 5.48 |
| 855 | 1 | 413.58 | 0.9 | 53.4 | 6.18 |
| 856 | 1 | 441.98 | 0.1 | 57.8 | 1.89 |
| 857 | 1 | 441.98 | 0.2 | 55.7 | 1.59 |
| 858 | 1 | 441.98 | 0.3 | 54.7 | 2.05 |
| 859 | 1 | 441.98 | 0.4 | 53.9 | 2.21 |
| 860 | 1 | 441.98 | 0.5 | 53   | 1.75 |
| 861 | 1 | 441.98 | 0.6 | 52.8 | 2.49 |
| 862 | 1 | 441.98 | 0.7 | 52.9 | 3.65 |
| 863 | 1 | 441.98 | 0.8 | 53.7 | 6.09 |
| 864 | 1 | 441.98 | 0.9 | 53.5 | 6.38 |
| 865 | 1 | 470.37 | 0.1 | 57.6 | 1.42 |
| 866 | 1 | 470.37 | 0.2 | 56   | 2.25 |
| 867 | 1 | 470.37 | 0.3 | 54.6 | 1.84 |
| 868 | 1 | 470.37 | 0.4 | 53.8 | 1.99 |
| 869 | 1 | 470.37 | 0.5 | 53.1 | 1.95 |
| 870 | 1 | 470.37 | 0.6 | 53.4 | 3.73 |
| 871 | 1 | 470.37 | 0.7 | 53.3 | 4.47 |
| 872 | 1 | 470.37 | 0.8 | 53.8 | 6.29 |
| 873 | 1 | 470.37 | 0.9 | 53.7 | 6.79 |
| 874 | 1 | 498.77 | 0.1 | 57.6 | 1.42 |
| 875 | 1 | 498.77 | 0.2 | 56.2 | 2.70 |
| 876 | 1 | 498.77 | 0.3 | 54.3 | 1.19 |
| 877 | 1 | 498.77 | 0.4 | 53.1 | 0.51 |
| 878 | 1 | 498.77 | 0.5 | 52.5 | 0.70 |
| 879 | 1 | 498.77 | 0.6 | 53.6 | 4.14 |
| 880 | 1 | 498.77 | 0.7 | 52.4 | 2.63 |
| 881 | 1 | 498.77 | 0.8 | 54.3 | 7.31 |
| 882 | 1 | 498.77 | 0.9 | 53.3 | 5.98 |
| 883 | 1 | 527.16 | 0.1 | 58.1 | 2.58 |
| 884 | 1 | 527.16 | 0.2 | 55.6 | 1.36 |
| 885 | 1 | 527.16 | 0.3 | 54.5 | 1.62 |
| 886 | 1 | 527.16 | 0.4 | 53.4 | 1.14 |
| 887 | 1 | 527.16 | 0.5 | 53.8 | 3.42 |
| 888 | 1 | 527.16 | 0.6 | 53.5 | 3.93 |
| 889 | 1 | 527.16 | 0.7 | 53.2 | 4.27 |
| 890 | 1 | 527.16 | 0.8 | 53.8 | 6.29 |
| 891 | 1 | 527.16 | 0.9 | 54.3 | 7.99 |

|     |   |        |     |      |      |
|-----|---|--------|-----|------|------|
| 892 | 1 | 555.56 | 0.1 | 57.6 | 1.42 |
| 893 | 1 | 555.56 | 0.2 | 55.7 | 1.59 |
| 894 | 1 | 555.56 | 0.3 | 54.8 | 2.27 |
| 895 | 1 | 555.56 | 0.4 | 53.9 | 2.21 |
| 896 | 1 | 555.56 | 0.5 | 54.1 | 4.04 |
| 897 | 1 | 555.56 | 0.6 | 53.5 | 3.93 |
| 898 | 1 | 555.56 | 0.7 | 53.6 | 5.08 |
| 899 | 1 | 555.56 | 0.8 | 54.2 | 7.10 |
| 900 | 1 | 555.56 | 0.9 | 54.5 | 8.40 |

### S5. Initial Screening Optimisation Study 500 nm IONPs

The results of the initial optimisation design space screening for 500 nm IONPs computing 1,000 particle trajectories are shown in Table S2.

**Table S2.** Capture and separator efficiency for the 900 simulations (10 tubing radii, 9 wire-to-tube radius ratios, and 10 flowrates between 0.01 ml/min and 1.00 ml/min) performed for the initial screening of the design space optimisation.

|    | Flowrate | Tubing radius | Wire-to-tubing rad. | Capture Efficiency | Separator Efficiency |
|----|----------|---------------|---------------------|--------------------|----------------------|
|    | [ml/min] | [ $\mu$ m]    | [-]                 | [%]                | [%]                  |
| 1  | 0.01     | 300           | 0.1                 | 60.8               | 8.86                 |
| 2  | 0.01     | 300           | 0.2                 | 65.8               | 24.02                |
| 3  | 0.01     | 300           | 0.3                 | 71.4               | 38.16                |
| 4  | 0.01     | 300           | 0.4                 | 84.3               | 66.69                |
| 5  | 0.01     | 300           | 0.5                 | 97.1               | 93.94                |
| 6  | 0.01     | 300           | 0.6                 | 100                | 100.00               |
| 7  | 0.01     | 300           | 0.7                 | 100                | 100.00               |
| 8  | 0.01     | 300           | 0.8                 | 100                | 100.00               |
| 9  | 0.01     | 300           | 0.9                 | 100                | 100.00               |
| 10 | 0.01     | 328.40        | 0.1                 | 61.2               | 9.79                 |
| 11 | 0.01     | 328.40        | 0.2                 | 63.6               | 19.14                |
| 12 | 0.01     | 328.40        | 0.3                 | 70.8               | 36.86                |
| 13 | 0.01     | 328.40        | 0.4                 | 87.4               | 73.27                |
| 14 | 0.01     | 328.40        | 0.5                 | 99                 | 97.91                |
| 15 | 0.01     | 328.40        | 0.6                 | 100                | 100.00               |
| 16 | 0.01     | 328.40        | 0.7                 | 100                | 100.00               |
| 17 | 0.01     | 328.40        | 0.8                 | 100                | 100.00               |
| 18 | 0.01     | 328.40        | 0.9                 | 100                | 100.00               |
| 19 | 0.01     | 356.79        | 0.1                 | 60.7               | 8.63                 |
| 20 | 0.01     | 356.79        | 0.2                 | 63.5               | 18.91                |
| 21 | 0.01     | 356.79        | 0.3                 | 71.6               | 38.59                |
| 22 | 0.01     | 356.79        | 0.4                 | 89.2               | 77.09                |
| 23 | 0.01     | 356.79        | 0.5                 | 98.6               | 97.07                |
| 24 | 0.01     | 356.79        | 0.6                 | 100                | 100.00               |
| 25 | 0.01     | 356.79        | 0.7                 | 100                | 100.00               |
| 26 | 0.01     | 356.79        | 0.8                 | 100                | 100.00               |
| 27 | 0.01     | 356.79        | 0.9                 | 100                | 100.00               |
| 28 | 0.01     | 385.19        | 0.1                 | 61.5               | 10.49                |
| 29 | 0.01     | 385.19        | 0.2                 | 65.5               | 23.36                |
| 30 | 0.01     | 385.19        | 0.3                 | 74.1               | 44.00                |
| 31 | 0.01     | 385.19        | 0.4                 | 92.4               | 83.88                |
| 32 | 0.01     | 385.19        | 0.5                 | 99.5               | 98.95                |
| 33 | 0.01     | 385.19        | 0.6                 | 100                | 100.00               |
| 34 | 0.01     | 385.19        | 0.7                 | 100                | 100.00               |

|    |      |        |     |      |        |
|----|------|--------|-----|------|--------|
| 35 | 0.01 | 385.19 | 0.8 | 100  | 100.00 |
| 36 | 0.01 | 385.19 | 0.9 | 100  | 100.00 |
| 37 | 0.01 | 413.58 | 0.1 | 59.6 | 6.07   |
| 38 | 0.01 | 413.58 | 0.2 | 64.8 | 21.80  |
| 39 | 0.01 | 413.58 | 0.3 | 77.1 | 50.49  |
| 40 | 0.01 | 413.58 | 0.4 | 93.5 | 86.21  |
| 41 | 0.01 | 413.58 | 0.5 | 100  | 100.00 |
| 42 | 0.01 | 413.58 | 0.6 | 100  | 100.00 |
| 43 | 0.01 | 413.58 | 0.7 | 100  | 100.00 |
| 44 | 0.01 | 413.58 | 0.8 | 100  | 100.00 |
| 45 | 0.01 | 413.58 | 0.9 | 100  | 100.00 |
| 46 | 0.01 | 441.98 | 0.1 | 60.1 | 7.23   |
| 47 | 0.01 | 441.98 | 0.2 | 64.1 | 20.25  |
| 48 | 0.01 | 441.98 | 0.3 | 77.8 | 52.00  |
| 49 | 0.01 | 441.98 | 0.4 | 95.3 | 90.03  |
| 50 | 0.01 | 441.98 | 0.5 | 100  | 100.00 |
| 51 | 0.01 | 441.98 | 0.6 | 100  | 100.00 |
| 52 | 0.01 | 441.98 | 0.7 | 100  | 100.00 |
| 53 | 0.01 | 441.98 | 0.8 | 100  | 100.00 |
| 54 | 0.01 | 441.98 | 0.9 | 100  | 100.00 |
| 55 | 0.01 | 470.37 | 0.1 | 61.9 | 11.42  |
| 56 | 0.01 | 470.37 | 0.2 | 65.6 | 23.58  |
| 57 | 0.01 | 470.37 | 0.3 | 79.9 | 56.54  |
| 58 | 0.01 | 470.37 | 0.4 | 94.8 | 88.97  |
| 59 | 0.01 | 470.37 | 0.5 | 100  | 100.00 |
| 60 | 0.01 | 470.37 | 0.6 | 100  | 100.00 |
| 61 | 0.01 | 470.37 | 0.7 | 100  | 100.00 |
| 62 | 0.01 | 470.37 | 0.8 | 100  | 100.00 |
| 63 | 0.01 | 470.37 | 0.9 | 100  | 100.00 |
| 64 | 0.01 | 498.77 | 0.1 | 61.4 | 10.26  |
| 65 | 0.01 | 498.77 | 0.2 | 65.8 | 24.02  |
| 66 | 0.01 | 498.77 | 0.3 | 81.2 | 59.35  |
| 67 | 0.01 | 498.77 | 0.4 | 96.8 | 93.21  |
| 68 | 0.01 | 498.77 | 0.5 | 100  | 100.00 |
| 69 | 0.01 | 498.77 | 0.6 | 100  | 100.00 |
| 70 | 0.01 | 498.77 | 0.7 | 100  | 100.00 |
| 71 | 0.01 | 498.77 | 0.8 | 100  | 100.00 |
| 72 | 0.01 | 498.77 | 0.9 | 100  | 100.00 |
| 73 | 0.01 | 527.16 | 0.1 | 60.7 | 8.63   |
| 74 | 0.01 | 527.16 | 0.2 | 65.8 | 24.02  |
| 75 | 0.01 | 527.16 | 0.3 | 82.4 | 61.95  |
| 76 | 0.01 | 527.16 | 0.4 | 99   | 97.88  |
| 77 | 0.01 | 527.16 | 0.5 | 100  | 100.00 |
| 78 | 0.01 | 527.16 | 0.6 | 100  | 100.00 |
| 79 | 0.01 | 527.16 | 0.7 | 100  | 100.00 |
| 80 | 0.01 | 527.16 | 0.8 | 100  | 100.00 |
| 81 | 0.01 | 527.16 | 0.9 | 100  | 100.00 |
| 82 | 0.01 | 555.56 | 0.1 | 61   | 9.33   |
| 83 | 0.01 | 555.56 | 0.2 | 65.9 | 24.25  |
| 84 | 0.01 | 555.56 | 0.3 | 82.8 | 62.81  |
| 85 | 0.01 | 555.56 | 0.4 | 99.9 | 99.79  |
| 86 | 0.01 | 555.56 | 0.5 | 100  | 100.00 |
| 87 | 0.01 | 555.56 | 0.6 | 100  | 100.00 |
| 88 | 0.01 | 555.56 | 0.7 | 100  | 100.00 |

|     |      |        |     |      |        |
|-----|------|--------|-----|------|--------|
| 89  | 0.01 | 555.56 | 0.8 | 100  | 100.00 |
| 90  | 0.01 | 555.56 | 0.9 | 100  | 100.00 |
| 91  | 0.12 | 300    | 0.1 | 57.6 | 1.42   |
| 92  | 0.12 | 300    | 0.2 | 56.6 | 3.59   |
| 93  | 0.12 | 300    | 0.3 | 56.2 | 5.30   |
| 94  | 0.12 | 300    | 0.4 | 56.4 | 7.51   |
| 95  | 0.12 | 300    | 0.5 | 57.8 | 11.78  |
| 96  | 0.12 | 300    | 0.6 | 63.3 | 24.18  |
| 97  | 0.12 | 300    | 0.7 | 66.3 | 31.06  |
| 98  | 0.12 | 300    | 0.8 | 80.3 | 60.04  |
| 99  | 0.12 | 300    | 0.9 | 93.1 | 86.11  |
| 100 | 0.12 | 328.40 | 0.1 | 58   | 2.35   |
| 101 | 0.12 | 328.40 | 0.2 | 56.5 | 3.36   |
| 102 | 0.12 | 328.40 | 0.3 | 56.6 | 6.16   |
| 103 | 0.12 | 328.40 | 0.4 | 57.1 | 8.99   |
| 104 | 0.12 | 328.40 | 0.5 | 58.7 | 13.66  |
| 105 | 0.12 | 328.40 | 0.6 | 62.7 | 22.94  |
| 106 | 0.12 | 328.40 | 0.7 | 72.1 | 42.93  |
| 107 | 0.12 | 328.40 | 0.8 | 88.6 | 76.88  |
| 108 | 0.12 | 328.40 | 0.9 | 98.2 | 96.38  |
| 109 | 0.12 | 356.79 | 0.1 | 58.3 | 3.05   |
| 110 | 0.12 | 356.79 | 0.2 | 57.1 | 4.70   |
| 111 | 0.12 | 356.79 | 0.3 | 56.6 | 6.16   |
| 112 | 0.12 | 356.79 | 0.4 | 58   | 10.90  |
| 113 | 0.12 | 356.79 | 0.5 | 60.9 | 18.26  |
| 114 | 0.12 | 356.79 | 0.6 | 65   | 27.69  |
| 115 | 0.12 | 356.79 | 0.7 | 79.5 | 58.07  |
| 116 | 0.12 | 356.79 | 0.8 | 93   | 85.80  |
| 117 | 0.12 | 356.79 | 0.9 | 98.4 | 96.78  |
| 118 | 0.12 | 385.19 | 0.1 | 58.6 | 3.75   |
| 119 | 0.12 | 385.19 | 0.2 | 56   | 2.25   |
| 120 | 0.12 | 385.19 | 0.3 | 56   | 4.86   |
| 121 | 0.12 | 385.19 | 0.4 | 59.2 | 13.45  |
| 122 | 0.12 | 385.19 | 0.5 | 60.1 | 16.59  |
| 123 | 0.12 | 385.19 | 0.6 | 71.3 | 40.71  |
| 124 | 0.12 | 385.19 | 0.7 | 84.2 | 67.68  |
| 125 | 0.12 | 385.19 | 0.8 | 96.9 | 93.71  |
| 126 | 0.12 | 385.19 | 0.9 | 100  | 100.00 |
| 127 | 0.12 | 413.58 | 0.1 | 57.7 | 1.65   |
| 128 | 0.12 | 413.58 | 0.2 | 56.8 | 4.03   |
| 129 | 0.12 | 413.58 | 0.3 | 56.2 | 5.30   |
| 130 | 0.12 | 413.58 | 0.4 | 58.5 | 11.96  |
| 131 | 0.12 | 413.58 | 0.5 | 61   | 18.47  |
| 132 | 0.12 | 413.58 | 0.6 | 74.5 | 47.32  |
| 133 | 0.12 | 413.58 | 0.7 | 87   | 73.41  |
| 134 | 0.12 | 413.58 | 0.8 | 98.8 | 97.57  |
| 135 | 0.12 | 413.58 | 0.9 | 100  | 100.00 |
| 136 | 0.12 | 441.98 | 0.1 | 57.6 | 1.42   |
| 137 | 0.12 | 441.98 | 0.2 | 56.4 | 3.14   |
| 138 | 0.12 | 441.98 | 0.3 | 56.1 | 5.08   |
| 139 | 0.12 | 441.98 | 0.4 | 58.5 | 11.96  |
| 140 | 0.12 | 441.98 | 0.5 | 65.3 | 27.46  |
| 141 | 0.12 | 441.98 | 0.6 | 78.9 | 56.41  |
| 142 | 0.12 | 441.98 | 0.7 | 92.2 | 84.04  |

|     |      |        |     |      |        |
|-----|------|--------|-----|------|--------|
| 143 | 0.12 | 441.98 | 0.8 | 99.8 | 99.59  |
| 144 | 0.12 | 441.98 | 0.9 | 100  | 100.00 |
| 145 | 0.12 | 470.37 | 0.1 | 58.4 | 3.28   |
| 146 | 0.12 | 470.37 | 0.2 | 56.7 | 3.81   |
| 147 | 0.12 | 470.37 | 0.3 | 56.6 | 6.16   |
| 148 | 0.12 | 470.37 | 0.4 | 59.2 | 13.45  |
| 149 | 0.12 | 470.37 | 0.5 | 68.3 | 33.73  |
| 150 | 0.12 | 470.37 | 0.6 | 80.5 | 59.71  |
| 151 | 0.12 | 470.37 | 0.7 | 94.4 | 88.54  |
| 152 | 0.12 | 470.37 | 0.8 | 100  | 100.00 |
| 153 | 0.12 | 470.37 | 0.9 | 100  | 100.00 |
| 154 | 0.12 | 498.77 | 0.1 | 57.8 | 1.89   |
| 155 | 0.12 | 498.77 | 0.2 | 56.4 | 3.14   |
| 156 | 0.12 | 498.77 | 0.3 | 57.8 | 8.76   |
| 157 | 0.12 | 498.77 | 0.4 | 59.7 | 14.51  |
| 158 | 0.12 | 498.77 | 0.5 | 70.9 | 39.17  |
| 159 | 0.12 | 498.77 | 0.6 | 82.9 | 64.67  |
| 160 | 0.12 | 498.77 | 0.7 | 98.3 | 96.52  |
| 161 | 0.12 | 498.77 | 0.8 | 100  | 100.00 |
| 162 | 0.12 | 498.77 | 0.9 | 100  | 100.00 |
| 163 | 0.12 | 527.16 | 0.1 | 58.6 | 3.75   |
| 164 | 0.12 | 527.16 | 0.2 | 56.6 | 3.59   |
| 165 | 0.12 | 527.16 | 0.3 | 56.8 | 6.59   |
| 166 | 0.12 | 527.16 | 0.4 | 61.3 | 17.90  |
| 167 | 0.12 | 527.16 | 0.5 | 73.2 | 43.97  |
| 168 | 0.12 | 527.16 | 0.6 | 84.5 | 67.98  |
| 169 | 0.12 | 527.16 | 0.7 | 99.9 | 99.80  |
| 170 | 0.12 | 527.16 | 0.8 | 100  | 100.00 |
| 171 | 0.12 | 527.16 | 0.9 | 100  | 100.00 |
| 172 | 0.12 | 555.56 | 0.1 | 58.2 | 2.82   |
| 173 | 0.12 | 555.56 | 0.2 | 56.8 | 4.03   |
| 174 | 0.12 | 555.56 | 0.3 | 58.5 | 10.27  |
| 175 | 0.12 | 555.56 | 0.4 | 62.5 | 20.45  |
| 176 | 0.12 | 555.56 | 0.5 | 74.9 | 47.53  |
| 177 | 0.12 | 555.56 | 0.6 | 88.5 | 76.24  |
| 178 | 0.12 | 555.56 | 0.7 | 100  | 100.00 |
| 179 | 0.12 | 555.56 | 0.8 | 100  | 100.00 |
| 180 | 0.12 | 555.56 | 0.9 | 100  | 100.00 |
| 181 | 0.23 | 300    | 0.1 | 57.4 | 0.96   |
| 182 | 0.23 | 300    | 0.2 | 55.2 | 0.48   |
| 183 | 0.23 | 300    | 0.3 | 54.8 | 2.27   |
| 184 | 0.23 | 300    | 0.4 | 54.5 | 3.48   |
| 185 | 0.23 | 300    | 0.5 | 55.3 | 6.55   |
| 186 | 0.23 | 300    | 0.6 | 57.7 | 12.61  |
| 187 | 0.23 | 300    | 0.7 | 58.3 | 14.70  |
| 188 | 0.23 | 300    | 0.8 | 67.7 | 34.49  |
| 189 | 0.23 | 300    | 0.9 | 74.8 | 49.27  |
| 190 | 0.23 | 328.40 | 0.1 | 57.4 | 0.96   |
| 191 | 0.23 | 328.40 | 0.2 | 55.3 | 0.70   |
| 192 | 0.23 | 328.40 | 0.3 | 54.9 | 2.48   |
| 193 | 0.23 | 328.40 | 0.4 | 54.8 | 4.12   |
| 194 | 0.23 | 328.40 | 0.5 | 56.9 | 9.90   |
| 195 | 0.23 | 328.40 | 0.6 | 58.2 | 13.64  |
| 196 | 0.23 | 328.40 | 0.7 | 63.3 | 24.93  |



|     |      |        |     |      |       |
|-----|------|--------|-----|------|-------|
| 197 | 0.23 | 328.40 | 0.8 | 71.2 | 41.59 |
| 198 | 0.23 | 328.40 | 0.9 | 78.8 | 57.32 |
| 199 | 0.23 | 356.79 | 0.1 | 57.4 | 0.96  |
| 200 | 0.23 | 356.79 | 0.2 | 56.2 | 2.70  |
| 201 | 0.23 | 356.79 | 0.3 | 55.9 | 4.65  |
| 202 | 0.23 | 356.79 | 0.4 | 55.3 | 5.18  |
| 203 | 0.23 | 356.79 | 0.5 | 56.2 | 8.44  |
| 204 | 0.23 | 356.79 | 0.6 | 59.7 | 16.74 |
| 205 | 0.23 | 356.79 | 0.7 | 68   | 34.54 |
| 206 | 0.23 | 356.79 | 0.8 | 75.5 | 50.31 |
| 207 | 0.23 | 356.79 | 0.9 | 81.8 | 63.36 |
| 208 | 0.23 | 385.19 | 0.1 | 57.8 | 1.89  |
| 209 | 0.23 | 385.19 | 0.2 | 56   | 2.25  |
| 210 | 0.23 | 385.19 | 0.3 | 55   | 2.70  |
| 211 | 0.23 | 385.19 | 0.4 | 55.7 | 6.02  |
| 212 | 0.23 | 385.19 | 0.5 | 57   | 10.11 |
| 213 | 0.23 | 385.19 | 0.6 | 62.8 | 23.15 |
| 214 | 0.23 | 385.19 | 0.7 | 69.7 | 38.02 |
| 215 | 0.23 | 385.19 | 0.8 | 78   | 55.38 |
| 216 | 0.23 | 385.19 | 0.9 | 88.9 | 77.65 |
| 217 | 0.23 | 413.58 | 0.1 | 57.5 | 1.19  |
| 218 | 0.23 | 413.58 | 0.2 | 55.8 | 1.81  |
| 219 | 0.23 | 413.58 | 0.3 | 55.5 | 3.78  |
| 220 | 0.23 | 413.58 | 0.4 | 56.2 | 7.08  |
| 221 | 0.23 | 413.58 | 0.5 | 56.9 | 9.90  |
| 222 | 0.23 | 413.58 | 0.6 | 64.9 | 27.49 |
| 223 | 0.23 | 413.58 | 0.7 | 71.9 | 42.52 |
| 224 | 0.23 | 413.58 | 0.8 | 80.6 | 60.65 |
| 225 | 0.23 | 413.58 | 0.9 | 94.8 | 89.53 |
| 226 | 0.23 | 441.98 | 0.1 | 57.5 | 1.19  |
| 227 | 0.23 | 441.98 | 0.2 | 56.2 | 2.70  |
| 228 | 0.23 | 441.98 | 0.3 | 55.9 | 4.65  |
| 229 | 0.23 | 441.98 | 0.4 | 55.9 | 6.45  |
| 230 | 0.23 | 441.98 | 0.5 | 59.3 | 14.92 |
| 231 | 0.23 | 441.98 | 0.6 | 67   | 31.82 |
| 232 | 0.23 | 441.98 | 0.7 | 73.6 | 46.00 |
| 233 | 0.23 | 441.98 | 0.8 | 86.5 | 72.62 |
| 234 | 0.23 | 441.98 | 0.9 | 97.8 | 95.57 |
| 235 | 0.23 | 470.37 | 0.1 | 57.7 | 1.65  |
| 236 | 0.23 | 470.37 | 0.2 | 56.2 | 2.70  |
| 237 | 0.23 | 470.37 | 0.3 | 55.3 | 3.35  |
| 238 | 0.23 | 470.37 | 0.4 | 56.7 | 8.15  |
| 239 | 0.23 | 470.37 | 0.5 | 62.3 | 21.19 |
| 240 | 0.23 | 470.37 | 0.6 | 69.5 | 36.99 |
| 241 | 0.23 | 470.37 | 0.7 | 76.6 | 52.13 |
| 242 | 0.23 | 470.37 | 0.8 | 91.4 | 82.56 |
| 243 | 0.23 | 470.37 | 0.9 | 99.5 | 98.99 |
| 244 | 0.23 | 498.77 | 0.1 | 57.7 | 1.65  |
| 245 | 0.23 | 498.77 | 0.2 | 56.4 | 3.14  |
| 246 | 0.23 | 498.77 | 0.3 | 55.9 | 4.65  |
| 247 | 0.23 | 498.77 | 0.4 | 56.1 | 6.87  |
| 248 | 0.23 | 498.77 | 0.5 | 63.2 | 23.07 |
| 249 | 0.23 | 498.77 | 0.6 | 70.3 | 38.64 |
| 250 | 0.23 | 498.77 | 0.7 | 79.6 | 58.27 |

|     |      |        |     |      |       |
|-----|------|--------|-----|------|-------|
| 251 | 0.23 | 498.77 | 0.8 | 94.9 | 89.66 |
| 252 | 0.23 | 498.77 | 0.9 | 99.5 | 98.99 |
| 253 | 0.23 | 527.16 | 0.1 | 57.5 | 1.19  |
| 254 | 0.23 | 527.16 | 0.2 | 56.2 | 2.70  |
| 255 | 0.23 | 527.16 | 0.3 | 56.5 | 5.94  |
| 256 | 0.23 | 527.16 | 0.4 | 57.5 | 9.84  |
| 257 | 0.23 | 527.16 | 0.5 | 65.2 | 27.25 |
| 258 | 0.23 | 527.16 | 0.6 | 71.9 | 41.95 |
| 259 | 0.23 | 527.16 | 0.7 | 84.2 | 67.68 |
| 260 | 0.23 | 527.16 | 0.8 | 97   | 93.92 |
| 261 | 0.23 | 527.16 | 0.9 | 99.9 | 99.80 |
| 262 | 0.23 | 555.56 | 0.1 | 57.5 | 1.19  |
| 263 | 0.23 | 555.56 | 0.2 | 56.6 | 3.59  |
| 264 | 0.23 | 555.56 | 0.3 | 56.4 | 5.73  |
| 265 | 0.23 | 555.56 | 0.4 | 58.9 | 12.81 |
| 266 | 0.23 | 555.56 | 0.5 | 66   | 28.92 |
| 267 | 0.23 | 555.56 | 0.6 | 73.8 | 45.87 |
| 268 | 0.23 | 555.56 | 0.7 | 87.1 | 73.61 |
| 269 | 0.23 | 555.56 | 0.8 | 99   | 97.97 |
| 270 | 0.23 | 555.56 | 0.9 | 99.8 | 99.60 |
| 271 | 0.34 | 300    | 0.1 | 57.3 | 0.72  |
| 272 | 0.34 | 300    | 0.2 | 55.5 | 1.14  |
| 273 | 0.34 | 300    | 0.3 | 54.6 | 1.84  |
| 274 | 0.34 | 300    | 0.4 | 54.8 | 4.12  |
| 275 | 0.34 | 300    | 0.5 | 55.1 | 6.14  |
| 276 | 0.34 | 300    | 0.6 | 55   | 7.03  |
| 277 | 0.34 | 300    | 0.7 | 57.3 | 12.65 |
| 278 | 0.34 | 300    | 0.8 | 63.2 | 25.36 |
| 279 | 0.34 | 300    | 0.9 | 67.6 | 34.77 |
| 280 | 0.34 | 328.40 | 0.1 | 57.1 | 0.26  |
| 281 | 0.34 | 328.40 | 0.2 | 56   | 2.25  |
| 282 | 0.34 | 328.40 | 0.3 | 55.1 | 2.92  |
| 283 | 0.34 | 328.40 | 0.4 | 54.6 | 3.69  |
| 284 | 0.34 | 328.40 | 0.5 | 54.9 | 5.72  |
| 285 | 0.34 | 328.40 | 0.6 | 55.7 | 8.48  |
| 286 | 0.34 | 328.40 | 0.7 | 59.6 | 17.36 |
| 287 | 0.34 | 328.40 | 0.8 | 65.8 | 30.63 |
| 288 | 0.34 | 328.40 | 0.9 | 70.1 | 39.80 |
| 289 | 0.34 | 356.79 | 0.1 | 57.9 | 2.12  |
| 290 | 0.34 | 356.79 | 0.2 | 55.8 | 1.81  |
| 291 | 0.34 | 356.79 | 0.3 | 54.4 | 1.40  |
| 292 | 0.34 | 356.79 | 0.4 | 54.8 | 4.12  |
| 293 | 0.34 | 356.79 | 0.5 | 55.4 | 6.76  |
| 294 | 0.34 | 356.79 | 0.6 | 57.6 | 12.40 |
| 295 | 0.34 | 356.79 | 0.7 | 62.6 | 23.49 |
| 296 | 0.34 | 356.79 | 0.8 | 68.2 | 35.50 |
| 297 | 0.34 | 356.79 | 0.9 | 72.1 | 43.83 |
| 298 | 0.34 | 385.19 | 0.1 | 57.8 | 1.89  |
| 299 | 0.34 | 385.19 | 0.2 | 55.8 | 1.81  |
| 300 | 0.34 | 385.19 | 0.3 | 54.4 | 1.40  |
| 301 | 0.34 | 385.19 | 0.4 | 54.8 | 4.12  |
| 302 | 0.34 | 385.19 | 0.5 | 55.5 | 6.97  |
| 303 | 0.34 | 385.19 | 0.6 | 59.2 | 15.71 |
| 304 | 0.34 | 385.19 | 0.7 | 64.5 | 27.38 |

|     |      |        |     |      |       |
|-----|------|--------|-----|------|-------|
| 305 | 0.34 | 385.19 | 0.8 | 70.5 | 40.17 |
| 306 | 0.34 | 385.19 | 0.9 | 77.2 | 54.10 |
| 307 | 0.34 | 413.58 | 0.1 | 57.8 | 1.89  |
| 308 | 0.34 | 413.58 | 0.2 | 55.7 | 1.59  |
| 309 | 0.34 | 413.58 | 0.3 | 55.2 | 3.13  |
| 310 | 0.34 | 413.58 | 0.4 | 55.1 | 4.75  |
| 311 | 0.34 | 413.58 | 0.5 | 56.4 | 8.85  |
| 312 | 0.34 | 413.58 | 0.6 | 61.5 | 20.46 |
| 313 | 0.34 | 413.58 | 0.7 | 66.9 | 32.29 |
| 314 | 0.34 | 413.58 | 0.8 | 72.7 | 44.63 |
| 315 | 0.34 | 413.58 | 0.9 | 81.4 | 62.55 |
| 316 | 0.34 | 441.98 | 0.1 | 57.8 | 1.89  |
| 317 | 0.34 | 441.98 | 0.2 | 56   | 2.25  |
| 318 | 0.34 | 441.98 | 0.3 | 54.7 | 2.05  |
| 319 | 0.34 | 441.98 | 0.4 | 55.7 | 6.02  |
| 320 | 0.34 | 441.98 | 0.5 | 56.1 | 8.23  |
| 321 | 0.34 | 441.98 | 0.6 | 63.2 | 23.97 |
| 322 | 0.34 | 441.98 | 0.7 | 66.8 | 32.09 |
| 323 | 0.34 | 441.98 | 0.8 | 76.1 | 51.52 |
| 324 | 0.34 | 441.98 | 0.9 | 85.6 | 71.01 |
| 325 | 0.34 | 470.37 | 0.1 | 58.1 | 2.58  |
| 326 | 0.34 | 470.37 | 0.2 | 56.7 | 3.81  |
| 327 | 0.34 | 470.37 | 0.3 | 55.6 | 4.00  |
| 328 | 0.34 | 470.37 | 0.4 | 55.1 | 4.75  |
| 329 | 0.34 | 470.37 | 0.5 | 59.3 | 14.92 |
| 330 | 0.34 | 470.37 | 0.6 | 64.7 | 27.07 |
| 331 | 0.34 | 470.37 | 0.7 | 69.8 | 38.22 |
| 332 | 0.34 | 470.37 | 0.8 | 79.8 | 59.03 |
| 333 | 0.34 | 470.37 | 0.9 | 88.7 | 77.25 |
| 334 | 0.34 | 498.77 | 0.1 | 57.5 | 1.19  |
| 335 | 0.34 | 498.77 | 0.2 | 56   | 2.25  |
| 336 | 0.34 | 498.77 | 0.3 | 55.1 | 2.92  |
| 337 | 0.34 | 498.77 | 0.4 | 55.5 | 5.60  |
| 338 | 0.34 | 498.77 | 0.5 | 60.3 | 17.01 |
| 339 | 0.34 | 498.77 | 0.6 | 65.9 | 29.55 |
| 340 | 0.34 | 498.77 | 0.7 | 71.9 | 42.52 |
| 341 | 0.34 | 498.77 | 0.8 | 81.5 | 62.48 |
| 342 | 0.34 | 498.77 | 0.9 | 91.8 | 83.49 |
| 343 | 0.34 | 527.16 | 0.1 | 57.9 | 2.12  |
| 344 | 0.34 | 527.16 | 0.2 | 55.9 | 2.03  |
| 345 | 0.34 | 527.16 | 0.3 | 55.6 | 4.00  |
| 346 | 0.34 | 527.16 | 0.4 | 56.7 | 8.15  |
| 347 | 0.34 | 527.16 | 0.5 | 61.4 | 19.31 |
| 348 | 0.34 | 527.16 | 0.6 | 66.6 | 31.00 |
| 349 | 0.34 | 527.16 | 0.7 | 74.7 | 48.25 |
| 350 | 0.34 | 527.16 | 0.8 | 83.9 | 67.34 |
| 351 | 0.34 | 527.16 | 0.9 | 93.2 | 86.31 |
| 352 | 0.34 | 555.56 | 0.1 | 58   | 2.35  |
| 353 | 0.34 | 555.56 | 0.2 | 55.6 | 1.36  |
| 354 | 0.34 | 555.56 | 0.3 | 55.7 | 4.21  |
| 355 | 0.34 | 555.56 | 0.4 | 56.5 | 7.72  |
| 356 | 0.34 | 555.56 | 0.5 | 61   | 18.47 |
| 357 | 0.34 | 555.56 | 0.6 | 67.9 | 33.68 |
| 358 | 0.34 | 555.56 | 0.7 | 76.7 | 52.34 |

|     |      |        |     |      |       |
|-----|------|--------|-----|------|-------|
| 359 | 0.34 | 555.56 | 0.8 | 85.5 | 70.59 |
| 360 | 0.34 | 555.56 | 0.9 | 94.7 | 89.33 |
| 361 | 0.45 | 300    | 0.1 | 58.3 | 3.05  |
| 362 | 0.45 | 300    | 0.2 | 55.1 | 0.25  |
| 363 | 0.45 | 300    | 0.3 | 54.6 | 1.84  |
| 364 | 0.45 | 300    | 0.4 | 54.1 | 2.63  |
| 365 | 0.45 | 300    | 0.5 | 53.7 | 3.21  |
| 366 | 0.45 | 300    | 0.6 | 53.9 | 4.76  |
| 367 | 0.45 | 300    | 0.7 | 54.1 | 6.11  |
| 368 | 0.45 | 300    | 0.8 | 58.9 | 16.64 |
| 369 | 0.45 | 300    | 0.9 | 63.1 | 25.71 |
| 370 | 0.45 | 328.40 | 0.1 | 57.6 | 1.42  |
| 371 | 0.45 | 328.40 | 0.2 | 55.7 | 1.59  |
| 372 | 0.45 | 328.40 | 0.3 | 54.4 | 1.40  |
| 373 | 0.45 | 328.40 | 0.4 | 54.3 | 3.05  |
| 374 | 0.45 | 328.40 | 0.5 | 54.7 | 5.30  |
| 375 | 0.45 | 328.40 | 0.6 | 54.9 | 6.83  |
| 376 | 0.45 | 328.40 | 0.7 | 57.6 | 13.27 |
| 377 | 0.45 | 328.40 | 0.8 | 61.1 | 21.10 |
| 378 | 0.45 | 328.40 | 0.9 | 64.5 | 28.53 |
| 379 | 0.45 | 356.79 | 0.1 | 58.3 | 3.05  |
| 380 | 0.45 | 356.79 | 0.2 | 55.3 | 0.70  |
| 381 | 0.45 | 356.79 | 0.3 | 54   | 0.54  |
| 382 | 0.45 | 356.79 | 0.4 | 54.4 | 3.27  |
| 383 | 0.45 | 356.79 | 0.5 | 54.5 | 4.88  |
| 384 | 0.45 | 356.79 | 0.6 | 55.1 | 7.24  |
| 385 | 0.45 | 356.79 | 0.7 | 59.8 | 17.77 |
| 386 | 0.45 | 356.79 | 0.8 | 63.6 | 26.17 |
| 387 | 0.45 | 356.79 | 0.9 | 66.7 | 32.96 |
| 388 | 0.45 | 385.19 | 0.1 | 57.7 | 1.65  |
| 389 | 0.45 | 385.19 | 0.2 | 55.1 | 0.25  |
| 390 | 0.45 | 385.19 | 0.3 | 54.3 | 1.19  |
| 391 | 0.45 | 385.19 | 0.4 | 54.8 | 4.12  |
| 392 | 0.45 | 385.19 | 0.5 | 55.2 | 6.34  |
| 393 | 0.45 | 385.19 | 0.6 | 57.4 | 11.99 |
| 394 | 0.45 | 385.19 | 0.7 | 62   | 22.27 |
| 395 | 0.45 | 385.19 | 0.8 | 66   | 31.04 |
| 396 | 0.45 | 385.19 | 0.9 | 71.3 | 42.22 |
| 397 | 0.45 | 413.58 | 0.1 | 57.5 | 1.19  |
| 398 | 0.45 | 413.58 | 0.2 | 55.6 | 1.36  |
| 399 | 0.45 | 413.58 | 0.3 | 55.5 | 3.78  |
| 400 | 0.45 | 413.58 | 0.4 | 54.5 | 3.48  |
| 401 | 0.45 | 413.58 | 0.5 | 55.3 | 6.55  |
| 402 | 0.45 | 413.58 | 0.6 | 59.3 | 15.92 |
| 403 | 0.45 | 413.58 | 0.7 | 62.6 | 23.49 |
| 404 | 0.45 | 413.58 | 0.8 | 67.4 | 33.88 |
| 405 | 0.45 | 413.58 | 0.9 | 74.2 | 48.06 |
| 406 | 0.45 | 441.98 | 0.1 | 57.6 | 1.42  |
| 407 | 0.45 | 441.98 | 0.2 | 55.7 | 1.59  |
| 408 | 0.45 | 441.98 | 0.3 | 55.3 | 3.35  |
| 409 | 0.45 | 441.98 | 0.4 | 55.1 | 4.75  |
| 410 | 0.45 | 441.98 | 0.5 | 55.8 | 7.60  |
| 411 | 0.45 | 441.98 | 0.6 | 60   | 17.36 |
| 412 | 0.45 | 441.98 | 0.7 | 64.4 | 27.18 |

|     |      |        |     |      |       |
|-----|------|--------|-----|------|-------|
| 413 | 0.45 | 441.98 | 0.8 | 70.5 | 40.17 |
| 414 | 0.45 | 441.98 | 0.9 | 77.6 | 54.90 |
| 415 | 0.45 | 470.37 | 0.1 | 57.7 | 1.65  |
| 416 | 0.45 | 470.37 | 0.2 | 55.6 | 1.36  |
| 417 | 0.45 | 470.37 | 0.3 | 55.3 | 3.35  |
| 418 | 0.45 | 470.37 | 0.4 | 55.3 | 5.18  |
| 419 | 0.45 | 470.37 | 0.5 | 57.3 | 10.73 |
| 420 | 0.45 | 470.37 | 0.6 | 60.8 | 19.01 |
| 421 | 0.45 | 470.37 | 0.7 | 65.6 | 29.63 |
| 422 | 0.45 | 470.37 | 0.8 | 73.4 | 46.05 |
| 423 | 0.45 | 470.37 | 0.9 | 80.2 | 60.14 |
| 424 | 0.45 | 498.77 | 0.1 | 58   | 2.35  |
| 425 | 0.45 | 498.77 | 0.2 | 55.4 | 0.92  |
| 426 | 0.45 | 498.77 | 0.3 | 55   | 2.70  |
| 427 | 0.45 | 498.77 | 0.4 | 54.9 | 4.33  |
| 428 | 0.45 | 498.77 | 0.5 | 58.5 | 13.24 |
| 429 | 0.45 | 498.77 | 0.6 | 61.9 | 21.29 |
| 430 | 0.45 | 498.77 | 0.7 | 68   | 34.54 |
| 431 | 0.45 | 498.77 | 0.8 | 75.6 | 50.51 |
| 432 | 0.45 | 498.77 | 0.9 | 81.4 | 62.55 |
| 433 | 0.45 | 527.16 | 0.1 | 57.5 | 1.19  |
| 434 | 0.45 | 527.16 | 0.2 | 56.2 | 2.70  |
| 435 | 0.45 | 527.16 | 0.3 | 55   | 2.70  |
| 436 | 0.45 | 527.16 | 0.4 | 55.6 | 5.81  |
| 437 | 0.45 | 527.16 | 0.5 | 59   | 14.29 |
| 438 | 0.45 | 527.16 | 0.6 | 63   | 23.56 |
| 439 | 0.45 | 527.16 | 0.7 | 70   | 38.63 |
| 440 | 0.45 | 527.16 | 0.8 | 76.8 | 52.94 |
| 441 | 0.45 | 527.16 | 0.9 | 83.1 | 65.98 |
| 442 | 0.45 | 555.56 | 0.1 | 57.5 | 1.19  |
| 443 | 0.45 | 555.56 | 0.2 | 56.2 | 2.70  |
| 444 | 0.45 | 555.56 | 0.3 | 55.3 | 3.35  |
| 445 | 0.45 | 555.56 | 0.4 | 55.8 | 6.24  |
| 446 | 0.45 | 555.56 | 0.5 | 59.6 | 15.54 |
| 447 | 0.45 | 555.56 | 0.6 | 64.7 | 27.07 |
| 448 | 0.45 | 555.56 | 0.7 | 71.4 | 41.50 |
| 449 | 0.45 | 555.56 | 0.8 | 77.9 | 55.17 |
| 450 | 0.45 | 555.56 | 0.9 | 85   | 69.80 |
| 451 | 0.56 | 300    | 0.1 | 57.6 | 1.42  |
| 452 | 0.56 | 300    | 0.2 | 55.5 | 1.14  |
| 453 | 0.56 | 300    | 0.3 | 54.6 | 1.84  |
| 454 | 0.56 | 300    | 0.4 | 54.2 | 2.84  |
| 455 | 0.56 | 300    | 0.5 | 53.8 | 3.42  |
| 456 | 0.56 | 300    | 0.6 | 54.7 | 6.41  |
| 457 | 0.56 | 300    | 0.7 | 54.4 | 6.72  |
| 458 | 0.56 | 300    | 0.8 | 58.1 | 15.02 |
| 459 | 0.56 | 300    | 0.9 | 60.5 | 20.48 |
| 460 | 0.56 | 328.40 | 0.1 | 57.5 | 1.19  |
| 461 | 0.56 | 328.40 | 0.2 | 55.8 | 1.81  |
| 462 | 0.56 | 328.40 | 0.3 | 54.6 | 1.84  |
| 463 | 0.56 | 328.40 | 0.4 | 53.7 | 1.78  |
| 464 | 0.56 | 328.40 | 0.5 | 53.7 | 3.21  |
| 465 | 0.56 | 328.40 | 0.6 | 54.1 | 5.17  |
| 466 | 0.56 | 328.40 | 0.7 | 56.1 | 10.20 |

|     |      |        |     |      |       |
|-----|------|--------|-----|------|-------|
| 467 | 0.56 | 328.40 | 0.8 | 58.9 | 16.64 |
| 468 | 0.56 | 328.40 | 0.9 | 61.2 | 21.89 |
| 469 | 0.56 | 356.79 | 0.1 | 58   | 2.35  |
| 470 | 0.56 | 356.79 | 0.2 | 55.7 | 1.59  |
| 471 | 0.56 | 356.79 | 0.3 | 54.3 | 1.19  |
| 472 | 0.56 | 356.79 | 0.4 | 54   | 2.42  |
| 473 | 0.56 | 356.79 | 0.5 | 54.8 | 5.51  |
| 474 | 0.56 | 356.79 | 0.6 | 55   | 7.03  |
| 475 | 0.56 | 356.79 | 0.7 | 58.1 | 14.29 |
| 476 | 0.56 | 356.79 | 0.8 | 60.9 | 20.69 |
| 477 | 0.56 | 356.79 | 0.9 | 63.8 | 27.12 |
| 478 | 0.56 | 385.19 | 0.1 | 57.7 | 1.65  |
| 479 | 0.56 | 385.19 | 0.2 | 55.9 | 2.03  |
| 480 | 0.56 | 385.19 | 0.3 | 55.2 | 3.13  |
| 481 | 0.56 | 385.19 | 0.4 | 54.5 | 3.48  |
| 482 | 0.56 | 385.19 | 0.5 | 54.8 | 5.51  |
| 483 | 0.56 | 385.19 | 0.6 | 56.3 | 9.72  |
| 484 | 0.56 | 385.19 | 0.7 | 58.8 | 15.72 |
| 485 | 0.56 | 385.19 | 0.8 | 62.3 | 23.53 |
| 486 | 0.56 | 385.19 | 0.9 | 67.2 | 33.97 |
| 487 | 0.56 | 413.58 | 0.1 | 57.2 | 0.49  |
| 488 | 0.56 | 413.58 | 0.2 | 55.6 | 1.36  |
| 489 | 0.56 | 413.58 | 0.3 | 55.1 | 2.92  |
| 490 | 0.56 | 413.58 | 0.4 | 54.4 | 3.27  |
| 491 | 0.56 | 413.58 | 0.5 | 55   | 5.93  |
| 492 | 0.56 | 413.58 | 0.6 | 58.3 | 13.85 |
| 493 | 0.56 | 413.58 | 0.7 | 60.4 | 18.99 |
| 494 | 0.56 | 413.58 | 0.8 | 64.5 | 28.00 |
| 495 | 0.56 | 413.58 | 0.9 | 69.5 | 38.60 |
| 496 | 0.56 | 441.98 | 0.1 | 57.4 | 0.96  |
| 497 | 0.56 | 441.98 | 0.2 | 56.2 | 2.70  |
| 498 | 0.56 | 441.98 | 0.3 | 54.9 | 2.48  |
| 499 | 0.56 | 441.98 | 0.4 | 54.9 | 4.33  |
| 500 | 0.56 | 441.98 | 0.5 | 55.6 | 7.18  |
| 501 | 0.56 | 441.98 | 0.6 | 57.8 | 12.82 |
| 502 | 0.56 | 441.98 | 0.7 | 61.4 | 21.04 |
| 503 | 0.56 | 441.98 | 0.8 | 67.2 | 33.47 |
| 504 | 0.56 | 441.98 | 0.9 | 73   | 45.64 |
| 505 | 0.56 | 470.37 | 0.1 | 57.6 | 1.42  |
| 506 | 0.56 | 470.37 | 0.2 | 55.7 | 1.59  |
| 507 | 0.56 | 470.37 | 0.3 | 55.4 | 3.57  |
| 508 | 0.56 | 470.37 | 0.4 | 54.7 | 3.90  |
| 509 | 0.56 | 470.37 | 0.5 | 56.1 | 8.23  |
| 510 | 0.56 | 470.37 | 0.6 | 59.2 | 15.71 |
| 511 | 0.56 | 470.37 | 0.7 | 63.1 | 24.52 |
| 512 | 0.56 | 470.37 | 0.8 | 69.9 | 38.95 |
| 513 | 0.56 | 470.37 | 0.9 | 74   | 47.66 |
| 514 | 0.56 | 498.77 | 0.1 | 57.9 | 2.12  |
| 515 | 0.56 | 498.77 | 0.2 | 56   | 2.25  |
| 516 | 0.56 | 498.77 | 0.3 | 54.9 | 2.48  |
| 517 | 0.56 | 498.77 | 0.4 | 54.1 | 2.63  |
| 518 | 0.56 | 498.77 | 0.5 | 57.3 | 10.73 |
| 519 | 0.56 | 498.77 | 0.6 | 60.7 | 18.81 |
| 520 | 0.56 | 498.77 | 0.7 | 65.3 | 29.02 |

|     |      |        |     |      |       |
|-----|------|--------|-----|------|-------|
| 521 | 0.56 | 498.77 | 0.8 | 71.2 | 41.59 |
| 522 | 0.56 | 498.77 | 0.9 | 75.5 | 50.68 |
| 523 | 0.56 | 527.16 | 0.1 | 57.7 | 1.65  |
| 524 | 0.56 | 527.16 | 0.2 | 55.9 | 2.03  |
| 525 | 0.56 | 527.16 | 0.3 | 55.7 | 4.21  |
| 526 | 0.56 | 527.16 | 0.4 | 55.2 | 4.96  |
| 527 | 0.56 | 527.16 | 0.5 | 58.8 | 13.87 |
| 528 | 0.56 | 527.16 | 0.6 | 61   | 19.43 |
| 529 | 0.56 | 527.16 | 0.7 | 67.1 | 32.70 |
| 530 | 0.56 | 527.16 | 0.8 | 72.8 | 44.83 |
| 531 | 0.56 | 527.16 | 0.9 | 78.1 | 55.91 |
| 532 | 0.56 | 555.56 | 0.1 | 57.5 | 1.19  |
| 533 | 0.56 | 555.56 | 0.2 | 55.4 | 0.92  |
| 534 | 0.56 | 555.56 | 0.3 | 54.4 | 1.40  |
| 535 | 0.56 | 555.56 | 0.4 | 55.4 | 5.39  |
| 536 | 0.56 | 555.56 | 0.5 | 57.8 | 11.78 |
| 537 | 0.56 | 555.56 | 0.6 | 61.7 | 20.87 |
| 538 | 0.56 | 555.56 | 0.7 | 69.1 | 36.79 |
| 539 | 0.56 | 555.56 | 0.8 | 73.2 | 45.64 |
| 540 | 0.56 | 555.56 | 0.9 | 77.6 | 54.90 |
| 541 | 0.67 | 300    | 0.1 | 57.6 | 1.42  |
| 542 | 0.67 | 300    | 0.2 | 55.9 | 2.03  |
| 543 | 0.67 | 300    | 0.3 | 54.1 | 0.76  |
| 544 | 0.67 | 300    | 0.4 | 53.7 | 1.78  |
| 545 | 0.67 | 300    | 0.5 | 53.3 | 2.37  |
| 546 | 0.67 | 300    | 0.6 | 53.2 | 3.31  |
| 547 | 0.67 | 300    | 0.7 | 54.1 | 6.11  |
| 548 | 0.67 | 300    | 0.8 | 56.7 | 12.18 |
| 549 | 0.67 | 300    | 0.9 | 58.9 | 17.26 |
| 550 | 0.67 | 328.40 | 0.1 | 57.4 | 0.96  |
| 551 | 0.67 | 328.40 | 0.2 | 55.2 | 0.48  |
| 552 | 0.67 | 328.40 | 0.3 | 54.6 | 1.84  |
| 553 | 0.67 | 328.40 | 0.4 | 53.9 | 2.21  |
| 554 | 0.67 | 328.40 | 0.5 | 54   | 3.84  |
| 555 | 0.67 | 328.40 | 0.6 | 53.7 | 4.35  |
| 556 | 0.67 | 328.40 | 0.7 | 54.8 | 7.54  |
| 557 | 0.67 | 328.40 | 0.8 | 58.1 | 15.02 |
| 558 | 0.67 | 328.40 | 0.9 | 59.7 | 18.87 |
| 559 | 0.67 | 356.79 | 0.1 | 57.9 | 2.12  |
| 560 | 0.67 | 356.79 | 0.2 | 56   | 2.25  |
| 561 | 0.67 | 356.79 | 0.3 | 54.4 | 1.40  |
| 562 | 0.67 | 356.79 | 0.4 | 54.6 | 3.69  |
| 563 | 0.67 | 356.79 | 0.5 | 53.6 | 3.00  |
| 564 | 0.67 | 356.79 | 0.6 | 54.3 | 5.59  |
| 565 | 0.67 | 356.79 | 0.7 | 57.1 | 12.24 |
| 566 | 0.67 | 356.79 | 0.8 | 59.3 | 17.45 |
| 567 | 0.67 | 356.79 | 0.9 | 61.9 | 23.30 |
| 568 | 0.67 | 385.19 | 0.1 | 57.8 | 1.89  |
| 569 | 0.67 | 385.19 | 0.2 | 55.3 | 0.70  |
| 570 | 0.67 | 385.19 | 0.3 | 55.2 | 3.13  |
| 571 | 0.67 | 385.19 | 0.4 | 54.6 | 3.69  |
| 572 | 0.67 | 385.19 | 0.5 | 54.1 | 4.04  |
| 573 | 0.67 | 385.19 | 0.6 | 55.4 | 7.86  |
| 574 | 0.67 | 385.19 | 0.7 | 57.5 | 13.06 |

|     |      |        |     |      |       |
|-----|------|--------|-----|------|-------|
| 575 | 0.67 | 385.19 | 0.8 | 60.5 | 19.88 |
| 576 | 0.67 | 385.19 | 0.9 | 64.2 | 27.93 |
| 577 | 0.67 | 413.58 | 0.1 | 57.4 | 0.96  |
| 578 | 0.67 | 413.58 | 0.2 | 56.2 | 2.70  |
| 579 | 0.67 | 413.58 | 0.3 | 54.9 | 2.48  |
| 580 | 0.67 | 413.58 | 0.4 | 54.8 | 4.12  |
| 581 | 0.67 | 413.58 | 0.5 | 54.7 | 5.30  |
| 582 | 0.67 | 413.58 | 0.6 | 56.5 | 10.13 |
| 583 | 0.67 | 413.58 | 0.7 | 59.2 | 16.54 |
| 584 | 0.67 | 413.58 | 0.8 | 61.8 | 22.52 |
| 585 | 0.67 | 413.58 | 0.9 | 67.2 | 33.97 |
| 586 | 0.67 | 441.98 | 0.1 | 58   | 2.35  |
| 587 | 0.67 | 441.98 | 0.2 | 55.9 | 2.03  |
| 588 | 0.67 | 441.98 | 0.3 | 54.9 | 2.48  |
| 589 | 0.67 | 441.98 | 0.4 | 54.6 | 3.69  |
| 590 | 0.67 | 441.98 | 0.5 | 54.8 | 5.51  |
| 591 | 0.67 | 441.98 | 0.6 | 56.9 | 10.96 |
| 592 | 0.67 | 441.98 | 0.7 | 59.6 | 17.36 |
| 593 | 0.67 | 441.98 | 0.8 | 65.1 | 29.21 |
| 594 | 0.67 | 441.98 | 0.9 | 68.8 | 37.19 |
| 595 | 0.67 | 470.37 | 0.1 | 58.2 | 2.82  |
| 596 | 0.67 | 470.37 | 0.2 | 56.1 | 2.48  |
| 597 | 0.67 | 470.37 | 0.3 | 55   | 2.70  |
| 598 | 0.67 | 470.37 | 0.4 | 54.6 | 3.69  |
| 599 | 0.67 | 470.37 | 0.5 | 55   | 5.93  |
| 600 | 0.67 | 470.37 | 0.6 | 58   | 13.23 |
| 601 | 0.67 | 470.37 | 0.7 | 61.4 | 21.04 |
| 602 | 0.67 | 470.37 | 0.8 | 66.7 | 32.46 |
| 603 | 0.67 | 470.37 | 0.9 | 71.7 | 43.03 |
| 604 | 0.67 | 498.77 | 0.1 | 57.6 | 1.42  |
| 605 | 0.67 | 498.77 | 0.2 | 55.9 | 2.03  |
| 606 | 0.67 | 498.77 | 0.3 | 54.7 | 2.05  |
| 607 | 0.67 | 498.77 | 0.4 | 54.3 | 3.05  |
| 608 | 0.67 | 498.77 | 0.5 | 56.5 | 9.06  |
| 609 | 0.67 | 498.77 | 0.6 | 59   | 15.30 |
| 610 | 0.67 | 498.77 | 0.7 | 63.3 | 24.93 |
| 611 | 0.67 | 498.77 | 0.8 | 68.1 | 35.30 |
| 612 | 0.67 | 498.77 | 0.9 | 71.3 | 42.22 |
| 613 | 0.67 | 527.16 | 0.1 | 58   | 2.35  |
| 614 | 0.67 | 527.16 | 0.2 | 55.8 | 1.81  |
| 615 | 0.67 | 527.16 | 0.3 | 54.6 | 1.84  |
| 616 | 0.67 | 527.16 | 0.4 | 55   | 4.54  |
| 617 | 0.67 | 527.16 | 0.5 | 57.1 | 10.32 |
| 618 | 0.67 | 527.16 | 0.6 | 59.7 | 16.74 |
| 619 | 0.67 | 527.16 | 0.7 | 63.9 | 26.15 |
| 620 | 0.67 | 527.16 | 0.8 | 69.5 | 38.14 |
| 621 | 0.67 | 527.16 | 0.9 | 72.3 | 44.23 |
| 622 | 0.67 | 555.56 | 0.1 | 57.2 | 0.49  |
| 623 | 0.67 | 555.56 | 0.2 | 55.4 | 0.92  |
| 624 | 0.67 | 555.56 | 0.3 | 54.9 | 2.48  |
| 625 | 0.67 | 555.56 | 0.4 | 55   | 4.54  |
| 626 | 0.67 | 555.56 | 0.5 | 57.5 | 11.15 |
| 627 | 0.67 | 555.56 | 0.6 | 60.8 | 19.01 |
| 628 | 0.67 | 555.56 | 0.7 | 66.2 | 30.86 |



|     |      |        |     |      |       |
|-----|------|--------|-----|------|-------|
| 629 | 0.67 | 555.56 | 0.8 | 70.5 | 40.17 |
| 630 | 0.67 | 555.56 | 0.9 | 73.5 | 46.65 |
| 631 | 0.78 | 300    | 0.1 | 57.7 | 1.65  |
| 632 | 0.78 | 300    | 0.2 | 55.6 | 1.37  |
| 633 | 0.78 | 300    | 0.3 | 54   | 0.54  |
| 634 | 0.78 | 300    | 0.4 | 54   | 2.42  |
| 635 | 0.78 | 300    | 0.5 | 53.2 | 2.16  |
| 636 | 0.78 | 300    | 0.6 | 53.1 | 3.11  |
| 637 | 0.78 | 300    | 0.7 | 52.9 | 3.65  |
| 638 | 0.78 | 300    | 0.8 | 54.8 | 8.32  |
| 639 | 0.78 | 300    | 0.9 | 57   | 13.43 |
| 640 | 0.78 | 328.40 | 0.1 | 57.9 | 2.12  |
| 641 | 0.78 | 328.40 | 0.2 | 56.3 | 2.92  |
| 642 | 0.78 | 328.40 | 0.3 | 54   | 0.54  |
| 643 | 0.78 | 328.40 | 0.4 | 53.7 | 1.78  |
| 644 | 0.78 | 328.40 | 0.5 | 53.8 | 3.42  |
| 645 | 0.78 | 328.40 | 0.6 | 53.6 | 4.14  |
| 646 | 0.78 | 328.40 | 0.7 | 54.5 | 6.93  |
| 647 | 0.78 | 328.40 | 0.8 | 56.8 | 12.38 |
| 648 | 0.78 | 328.40 | 0.9 | 57.4 | 14.24 |
| 649 | 0.78 | 356.79 | 0.1 | 57.7 | 1.65  |
| 650 | 0.78 | 356.79 | 0.2 | 55.8 | 1.81  |
| 651 | 0.78 | 356.79 | 0.3 | 53.8 | 0.11  |
| 652 | 0.78 | 356.79 | 0.4 | 54.1 | 2.63  |
| 653 | 0.78 | 356.79 | 0.5 | 53.3 | 2.37  |
| 654 | 0.78 | 356.79 | 0.6 | 53.7 | 4.35  |
| 655 | 0.78 | 356.79 | 0.7 | 56.3 | 10.61 |
| 656 | 0.78 | 356.79 | 0.8 | 58.1 | 15.02 |
| 657 | 0.78 | 356.79 | 0.9 | 59.1 | 17.66 |
| 658 | 0.78 | 385.19 | 0.1 | 58   | 2.35  |
| 659 | 0.78 | 385.19 | 0.2 | 55.6 | 1.36  |
| 660 | 0.78 | 385.19 | 0.3 | 54.9 | 2.48  |
| 661 | 0.78 | 385.19 | 0.4 | 54.5 | 3.48  |
| 662 | 0.78 | 385.19 | 0.5 | 53.8 | 3.42  |
| 663 | 0.78 | 385.19 | 0.6 | 55.4 | 7.86  |
| 664 | 0.78 | 385.19 | 0.7 | 57.3 | 12.65 |
| 665 | 0.78 | 385.19 | 0.8 | 59.7 | 18.26 |
| 666 | 0.78 | 385.19 | 0.9 | 62.2 | 23.90 |
| 667 | 0.78 | 413.58 | 0.1 | 57.9 | 2.12  |
| 668 | 0.78 | 413.58 | 0.2 | 55.6 | 1.36  |
| 669 | 0.78 | 413.58 | 0.3 | 54.9 | 2.48  |
| 670 | 0.78 | 413.58 | 0.4 | 54.5 | 3.48  |
| 671 | 0.78 | 413.58 | 0.5 | 53.9 | 3.63  |
| 672 | 0.78 | 413.58 | 0.6 | 55.5 | 8.07  |
| 673 | 0.78 | 413.58 | 0.7 | 58.2 | 14.49 |
| 674 | 0.78 | 413.58 | 0.8 | 60.5 | 19.88 |
| 675 | 0.78 | 413.58 | 0.9 | 64.5 | 28.53 |
| 676 | 0.78 | 441.98 | 0.1 | 58   | 2.35  |
| 677 | 0.78 | 441.98 | 0.2 | 56   | 2.25  |
| 678 | 0.78 | 441.98 | 0.3 | 54.6 | 1.84  |
| 679 | 0.78 | 441.98 | 0.4 | 54.7 | 3.90  |
| 680 | 0.78 | 441.98 | 0.5 | 54.2 | 4.25  |
| 681 | 0.78 | 441.98 | 0.6 | 56.8 | 10.75 |
| 682 | 0.78 | 441.98 | 0.7 | 59.1 | 16.34 |

|     |      |        |     |      |       |
|-----|------|--------|-----|------|-------|
| 683 | 0.78 | 441.98 | 0.8 | 62.5 | 23.94 |
| 684 | 0.78 | 441.98 | 0.9 | 67.4 | 34.37 |
| 685 | 0.78 | 470.37 | 0.1 | 57.8 | 1.89  |
| 686 | 0.78 | 470.37 | 0.2 | 55.6 | 1.36  |
| 687 | 0.78 | 470.37 | 0.3 | 55   | 2.70  |
| 688 | 0.78 | 470.37 | 0.4 | 54.6 | 3.69  |
| 689 | 0.78 | 470.37 | 0.5 | 55.4 | 6.76  |
| 690 | 0.78 | 470.37 | 0.6 | 56.8 | 10.75 |
| 691 | 0.78 | 470.37 | 0.7 | 59.3 | 16.74 |
| 692 | 0.78 | 470.37 | 0.8 | 63.7 | 26.37 |
| 693 | 0.78 | 470.37 | 0.9 | 68.9 | 37.39 |
| 694 | 0.78 | 498.77 | 0.1 | 57.9 | 2.12  |
| 695 | 0.78 | 498.77 | 0.2 | 55.7 | 1.59  |
| 696 | 0.78 | 498.77 | 0.3 | 55.4 | 3.57  |
| 697 | 0.78 | 498.77 | 0.4 | 54   | 2.42  |
| 698 | 0.78 | 498.77 | 0.5 | 55.9 | 7.81  |
| 699 | 0.78 | 498.77 | 0.6 | 57.6 | 12.40 |
| 700 | 0.78 | 498.77 | 0.7 | 61.1 | 20.43 |
| 701 | 0.78 | 498.77 | 0.8 | 66.3 | 31.65 |
| 702 | 0.78 | 498.77 | 0.9 | 69.9 | 39.40 |
| 703 | 0.78 | 527.16 | 0.1 | 57.9 | 2.12  |
| 704 | 0.78 | 527.16 | 0.2 | 56.3 | 2.92  |
| 705 | 0.78 | 527.16 | 0.3 | 55   | 2.70  |
| 706 | 0.78 | 527.16 | 0.4 | 55.1 | 4.75  |
| 707 | 0.78 | 527.16 | 0.5 | 56.2 | 8.43  |
| 708 | 0.78 | 527.16 | 0.6 | 58   | 13.23 |
| 709 | 0.78 | 527.16 | 0.7 | 62.5 | 23.29 |
| 710 | 0.78 | 527.16 | 0.8 | 67.2 | 33.47 |
| 711 | 0.78 | 527.16 | 0.9 | 69.2 | 37.99 |
| 712 | 0.78 | 555.56 | 0.1 | 57.6 | 1.42  |
| 713 | 0.78 | 555.56 | 0.2 | 55.9 | 2.03  |
| 714 | 0.78 | 555.56 | 0.3 | 54.5 | 1.62  |
| 715 | 0.78 | 555.56 | 0.4 | 54.8 | 4.11  |
| 716 | 0.78 | 555.56 | 0.5 | 57.2 | 10.53 |
| 717 | 0.78 | 555.56 | 0.6 | 59.4 | 16.12 |
| 718 | 0.78 | 555.56 | 0.7 | 64   | 26.36 |
| 719 | 0.78 | 555.56 | 0.8 | 67.7 | 34.49 |
| 720 | 0.78 | 555.56 | 0.9 | 71.2 | 42.02 |
| 721 | 0.89 | 300    | 0.1 | 57.6 | 1.42  |
| 722 | 0.89 | 300    | 0.2 | 55.6 | 1.37  |
| 723 | 0.89 | 300    | 0.3 | 54.3 | 1.19  |
| 724 | 0.89 | 300    | 0.4 | 53.9 | 2.21  |
| 725 | 0.89 | 300    | 0.5 | 53.6 | 3.00  |
| 726 | 0.89 | 300    | 0.6 | 53   | 2.90  |
| 727 | 0.89 | 300    | 0.7 | 53.2 | 4.27  |
| 728 | 0.89 | 300    | 0.8 | 54.8 | 8.32  |
| 729 | 0.89 | 300    | 0.9 | 55.7 | 10.81 |
| 730 | 0.89 | 328.40 | 0.1 | 58   | 2.35  |
| 731 | 0.89 | 328.40 | 0.2 | 55.4 | 0.92  |
| 732 | 0.89 | 328.40 | 0.3 | 54.3 | 1.19  |
| 733 | 0.89 | 328.40 | 0.4 | 53.8 | 1.99  |
| 734 | 0.89 | 328.40 | 0.5 | 53.1 | 1.95  |
| 735 | 0.89 | 328.40 | 0.6 | 52.9 | 2.69  |
| 736 | 0.89 | 328.40 | 0.7 | 53.3 | 4.47  |

|     |      |        |     |      |       |
|-----|------|--------|-----|------|-------|
| 737 | 0.89 | 328.40 | 0.8 | 56   | 10.76 |
| 738 | 0.89 | 328.40 | 0.9 | 57.2 | 13.83 |
| 739 | 0.89 | 356.79 | 0.1 | 56.9 | -0.21 |
| 740 | 0.89 | 356.79 | 0.2 | 55.3 | 0.70  |
| 741 | 0.89 | 356.79 | 0.3 | 54.8 | 2.27  |
| 742 | 0.89 | 356.79 | 0.4 | 53.5 | 1.36  |
| 743 | 0.89 | 356.79 | 0.5 | 54.5 | 4.88  |
| 744 | 0.89 | 356.79 | 0.6 | 54.2 | 5.38  |
| 745 | 0.89 | 356.79 | 0.7 | 56   | 9.99  |
| 746 | 0.89 | 356.79 | 0.8 | 56.8 | 12.38 |
| 747 | 0.89 | 356.79 | 0.9 | 58.1 | 15.65 |
| 748 | 0.89 | 385.19 | 0.1 | 57.8 | 1.89  |
| 749 | 0.89 | 385.19 | 0.2 | 55.6 | 1.36  |
| 750 | 0.89 | 385.19 | 0.3 | 54.7 | 2.05  |
| 751 | 0.89 | 385.19 | 0.4 | 54   | 2.42  |
| 752 | 0.89 | 385.19 | 0.5 | 53.4 | 2.58  |
| 753 | 0.89 | 385.19 | 0.6 | 54.5 | 6.00  |
| 754 | 0.89 | 385.19 | 0.7 | 56.1 | 10.20 |
| 755 | 0.89 | 385.19 | 0.8 | 57.4 | 13.60 |
| 756 | 0.89 | 385.19 | 0.9 | 61.5 | 22.49 |
| 757 | 0.89 | 413.58 | 0.1 | 57.9 | 2.12  |
| 758 | 0.89 | 413.58 | 0.2 | 55.9 | 2.03  |
| 759 | 0.89 | 413.58 | 0.3 | 54.8 | 2.27  |
| 760 | 0.89 | 413.58 | 0.4 | 53.5 | 1.36  |
| 761 | 0.89 | 413.58 | 0.5 | 53   | 1.75  |
| 762 | 0.89 | 413.58 | 0.6 | 55.2 | 7.45  |
| 763 | 0.89 | 413.58 | 0.7 | 57.3 | 12.65 |
| 764 | 0.89 | 413.58 | 0.8 | 60   | 18.87 |
| 765 | 0.89 | 413.58 | 0.9 | 61.4 | 22.29 |
| 766 | 0.89 | 441.98 | 0.1 | 57.3 | 0.72  |
| 767 | 0.89 | 441.98 | 0.2 | 56.2 | 2.70  |
| 768 | 0.89 | 441.98 | 0.3 | 54.2 | 0.97  |
| 769 | 0.89 | 441.98 | 0.4 | 53.6 | 1.57  |
| 770 | 0.89 | 441.98 | 0.5 | 54.2 | 4.25  |
| 771 | 0.89 | 441.98 | 0.6 | 56.1 | 9.30  |
| 772 | 0.89 | 441.98 | 0.7 | 56.6 | 11.22 |
| 773 | 0.89 | 441.98 | 0.8 | 60.5 | 19.88 |
| 774 | 0.89 | 441.98 | 0.9 | 64.7 | 28.93 |
| 775 | 0.89 | 470.37 | 0.1 | 57.5 | 1.19  |
| 776 | 0.89 | 470.37 | 0.2 | 55.7 | 1.59  |
| 777 | 0.89 | 470.37 | 0.3 | 55   | 2.70  |
| 778 | 0.89 | 470.37 | 0.4 | 54.2 | 2.84  |
| 779 | 0.89 | 470.37 | 0.5 | 54.9 | 5.72  |
| 780 | 0.89 | 470.37 | 0.6 | 56.4 | 9.92  |
| 781 | 0.89 | 470.37 | 0.7 | 58.4 | 14.90 |
| 782 | 0.89 | 470.37 | 0.8 | 62.9 | 24.75 |
| 783 | 0.89 | 470.37 | 0.9 | 66.9 | 33.36 |
| 784 | 0.89 | 498.77 | 0.1 | 57.9 | 2.12  |
| 785 | 0.89 | 498.77 | 0.2 | 55.2 | 0.48  |
| 786 | 0.89 | 498.77 | 0.3 | 54.8 | 2.27  |
| 787 | 0.89 | 498.77 | 0.4 | 53.8 | 1.99  |
| 788 | 0.89 | 498.77 | 0.5 | 55   | 5.93  |
| 789 | 0.89 | 498.77 | 0.6 | 57.3 | 11.78 |
| 790 | 0.89 | 498.77 | 0.7 | 60.3 | 18.79 |

|     |      |        |     |      |       |
|-----|------|--------|-----|------|-------|
| 791 | 0.89 | 498.77 | 0.8 | 64.1 | 27.18 |
| 792 | 0.89 | 498.77 | 0.9 | 66.7 | 32.96 |
| 793 | 0.89 | 527.16 | 0.1 | 57.7 | 1.65  |
| 794 | 0.89 | 527.16 | 0.2 | 56.1 | 2.48  |
| 795 | 0.89 | 527.16 | 0.3 | 54.8 | 2.27  |
| 796 | 0.89 | 527.16 | 0.4 | 54.5 | 3.48  |
| 797 | 0.89 | 527.16 | 0.5 | 55.9 | 7.81  |
| 798 | 0.89 | 527.16 | 0.6 | 57.1 | 11.37 |
| 799 | 0.89 | 527.16 | 0.7 | 61.3 | 20.84 |
| 800 | 0.89 | 527.16 | 0.8 | 64.4 | 27.79 |
| 801 | 0.89 | 527.16 | 0.9 | 67.4 | 34.37 |
| 802 | 0.89 | 555.56 | 0.1 | 57.6 | 1.42  |
| 803 | 0.89 | 555.56 | 0.2 | 55.5 | 1.14  |
| 804 | 0.89 | 555.56 | 0.3 | 54.9 | 2.48  |
| 805 | 0.89 | 555.56 | 0.4 | 54.9 | 4.33  |
| 806 | 0.89 | 555.56 | 0.5 | 56   | 8.02  |
| 807 | 0.89 | 555.56 | 0.6 | 58.3 | 13.85 |
| 808 | 0.89 | 555.56 | 0.7 | 62.8 | 23.90 |
| 809 | 0.89 | 555.56 | 0.8 | 65.5 | 30.02 |
| 810 | 0.89 | 555.56 | 0.9 | 68.5 | 36.58 |
| 811 | 1    | 300    | 0.1 | 58   | 2.35  |
| 812 | 1    | 300    | 0.2 | 55.1 | 0.25  |
| 813 | 1    | 300    | 0.3 | 54.2 | 0.97  |
| 814 | 1    | 300    | 0.4 | 53.7 | 1.78  |
| 815 | 1    | 300    | 0.5 | 53.1 | 1.95  |
| 816 | 1    | 300    | 0.6 | 53   | 2.90  |
| 817 | 1    | 300    | 0.7 | 52.9 | 3.65  |
| 818 | 1    | 300    | 0.8 | 53.2 | 5.08  |
| 819 | 1    | 300    | 0.9 | 55.6 | 10.61 |
| 820 | 1    | 328.40 | 0.1 | 57.4 | 0.96  |
| 821 | 1    | 328.40 | 0.2 | 56   | 2.25  |
| 822 | 1    | 328.40 | 0.3 | 54.7 | 2.05  |
| 823 | 1    | 328.40 | 0.4 | 54   | 2.42  |
| 824 | 1    | 328.40 | 0.5 | 53.4 | 2.58  |
| 825 | 1    | 328.40 | 0.6 | 52.6 | 2.07  |
| 826 | 1    | 328.40 | 0.7 | 53.8 | 5.49  |
| 827 | 1    | 328.40 | 0.8 | 56.1 | 10.96 |
| 828 | 1    | 328.40 | 0.9 | 56.1 | 11.62 |
| 829 | 1    | 356.79 | 0.1 | 58.1 | 2.58  |
| 830 | 1    | 356.79 | 0.2 | 55.4 | 0.92  |
| 831 | 1    | 356.79 | 0.3 | 54.2 | 0.97  |
| 832 | 1    | 356.79 | 0.4 | 53.6 | 1.57  |
| 833 | 1    | 356.79 | 0.5 | 53.6 | 3.00  |
| 834 | 1    | 356.79 | 0.6 | 53.8 | 4.55  |
| 835 | 1    | 356.79 | 0.7 | 55.5 | 8.97  |
| 836 | 1    | 356.79 | 0.8 | 56.3 | 11.36 |
| 837 | 1    | 356.79 | 0.9 | 56.3 | 12.02 |
| 838 | 1    | 385.19 | 0.1 | 57.5 | 1.19  |
| 839 | 1    | 385.19 | 0.2 | 55.8 | 1.81  |
| 840 | 1    | 385.19 | 0.3 | 54.1 | 0.76  |
| 841 | 1    | 385.19 | 0.4 | 53.4 | 1.15  |
| 842 | 1    | 385.19 | 0.5 | 53.6 | 3.00  |
| 843 | 1    | 385.19 | 0.6 | 54.7 | 6.41  |
| 844 | 1    | 385.19 | 0.7 | 55.3 | 8.56  |

|     |   |        |     |      |       |
|-----|---|--------|-----|------|-------|
| 845 | 1 | 385.19 | 0.8 | 56.7 | 12.18 |
| 846 | 1 | 385.19 | 0.9 | 59.7 | 18.87 |
| 847 | 1 | 413.58 | 0.1 | 57.6 | 1.42  |
| 848 | 1 | 413.58 | 0.2 | 55.7 | 1.59  |
| 849 | 1 | 413.58 | 0.3 | 54.5 | 1.62  |
| 850 | 1 | 413.58 | 0.4 | 53.7 | 1.78  |
| 851 | 1 | 413.58 | 0.5 | 53.6 | 3.00  |
| 852 | 1 | 413.58 | 0.6 | 55.3 | 7.65  |
| 853 | 1 | 413.58 | 0.7 | 56.1 | 10.20 |
| 854 | 1 | 413.58 | 0.8 | 58.1 | 15.02 |
| 855 | 1 | 413.58 | 0.9 | 60.9 | 21.28 |
| 856 | 1 | 441.98 | 0.1 | 57.5 | 1.19  |
| 857 | 1 | 441.98 | 0.2 | 55.4 | 0.92  |
| 858 | 1 | 441.98 | 0.3 | 54.7 | 2.05  |
| 859 | 1 | 441.98 | 0.4 | 54.1 | 2.63  |
| 860 | 1 | 441.98 | 0.5 | 54.2 | 4.25  |
| 861 | 1 | 441.98 | 0.6 | 55.4 | 7.86  |
| 862 | 1 | 441.98 | 0.7 | 57.2 | 12.45 |
| 863 | 1 | 441.98 | 0.8 | 60.1 | 19.07 |
| 864 | 1 | 441.98 | 0.9 | 62.7 | 24.91 |
| 865 | 1 | 470.37 | 0.1 | 57.5 | 1.19  |
| 866 | 1 | 470.37 | 0.2 | 55.9 | 2.03  |
| 867 | 1 | 470.37 | 0.3 | 54.8 | 2.27  |
| 868 | 1 | 470.37 | 0.4 | 54   | 2.42  |
| 869 | 1 | 470.37 | 0.5 | 54.5 | 4.88  |
| 870 | 1 | 470.37 | 0.6 | 56   | 9.10  |
| 871 | 1 | 470.37 | 0.7 | 57.7 | 13.47 |
| 872 | 1 | 470.37 | 0.8 | 60.7 | 20.29 |
| 873 | 1 | 470.37 | 0.9 | 63.9 | 27.32 |
| 874 | 1 | 498.77 | 0.1 | 58   | 2.35  |
| 875 | 1 | 498.77 | 0.2 | 56.1 | 2.48  |
| 876 | 1 | 498.77 | 0.3 | 54.8 | 2.27  |
| 877 | 1 | 498.77 | 0.4 | 53.8 | 1.99  |
| 878 | 1 | 498.77 | 0.5 | 54.8 | 5.51  |
| 879 | 1 | 498.77 | 0.6 | 56.4 | 9.92  |
| 880 | 1 | 498.77 | 0.7 | 59.2 | 16.54 |
| 881 | 1 | 498.77 | 0.8 | 62.1 | 23.13 |
| 882 | 1 | 498.77 | 0.9 | 65.4 | 30.34 |
| 883 | 1 | 527.16 | 0.1 | 58.1 | 2.58  |
| 884 | 1 | 527.16 | 0.2 | 55.6 | 1.36  |
| 885 | 1 | 527.16 | 0.3 | 54.5 | 1.62  |
| 886 | 1 | 527.16 | 0.4 | 54.1 | 2.63  |
| 887 | 1 | 527.16 | 0.5 | 56.1 | 8.23  |
| 888 | 1 | 527.16 | 0.6 | 57.1 | 11.37 |
| 889 | 1 | 527.16 | 0.7 | 60.3 | 18.79 |
| 890 | 1 | 527.16 | 0.8 | 62.5 | 23.94 |
| 891 | 1 | 527.16 | 0.9 | 66.2 | 31.95 |
| 892 | 1 | 555.56 | 0.1 | 57.6 | 1.42  |
| 893 | 1 | 555.56 | 0.2 | 55.6 | 1.36  |
| 894 | 1 | 555.56 | 0.3 | 54.9 | 2.48  |
| 895 | 1 | 555.56 | 0.4 | 54.9 | 4.33  |
| 896 | 1 | 555.56 | 0.5 | 55.6 | 7.18  |
| 897 | 1 | 555.56 | 0.6 | 57.6 | 12.40 |
| 898 | 1 | 555.56 | 0.7 | 61.1 | 20.43 |

---

|            |   |        |     |      |       |
|------------|---|--------|-----|------|-------|
| <b>899</b> | 1 | 555.56 | 0.8 | 64.4 | 27.79 |
| <b>900</b> | 1 | 555.56 | 0.9 | 67.4 | 34.37 |

---
